# Supplementary material for: ‘On-water’ organic synthesis: a green, highly efficient, low cost and reusable catalyst system for biaryl synthesis under aerobic conditions at room temperature
Source: Royal Society of Chemistry journal article supplement (doi:10.1039/c5ra09102k), 2015-01-01

## Supporting Information

### **‘On-water’ organic synthesis: A green, highly efficient, low cost and reusable catalyst system for biaryl synthesis under aerobic conditions at room temperature**

Bishwajit Saikia\*, Preeti Rekha Boruah, Abdul Aziz Ali and Diganta Sarma

Department of Chemistry, Dibrugarh University, Dibrugarh-786004, Assam, India

Tel: +91 9954314676; E-mail: bishwajitsaikia@gmail.com (*B. Saikia*)

### Contents

|                                                                            |         |
|----------------------------------------------------------------------------|---------|
| Materials and Methods                                                      | P1      |
| General experimental procedure                                             | P1      |
| Characterization data of the product of the Suzuki reaction                | P2–P9   |
| References                                                                 | P9–P11  |
| <sup>1</sup> H and <sup>13</sup> C NMR spectra for cross-coupling products | P12–P41 |

## Materials and Methods

All aryl/heteroaryl bromides and arylboronic acids were used as received (Alfa Aesar, MARC, Sigma-Aldrich). All other chemicals were purchased from commercial sources and used without further purification.  $^1\text{H}$  NMR and  $^{13}\text{C}$  NMR spectra were recorded at 500 MHz using TMS as internal standard. Mass spectroscopy data of the product of Suzuki reaction was collected on a MS-EI instrument.

## General experimental procedure

In a round bottomed flask, a mixture of aryl/heteroaryl halide (1 mmol), arylboronic acid (1.2 mmol),  $\text{PdCl}_2$  (0.01 mmol), sucrose (0.005 mmol) and  $\text{K}_2\text{CO}_3$  (1.2 mmol) in  $\text{H}_2\text{O}$  (3 mL) and the mixture was stirred at room temperature for a time period as mentioned in Table 2 in the manuscript. The progress of the reaction was monitored by TLC. After completion of the reaction it was extracted with diethyl ether (3 x 10 mL) and washed with water. The combined ether extract was dried over anhydrous  $\text{Na}_2\text{SO}_4$ . The filtrate was concentrated under reduced pressure. The product was purified by column chromatography over silica gel using *n*-hexane/ethyl acetate (9:1 v/v) to get the desired coupling product. The products were characterized by IR,  $^1\text{H}$  NMR and  $^{13}\text{C}$  NMR spectroscopy.

## Characterization data of the product of the Suzuki reaction<sup>1-22</sup>

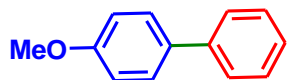

### 4-Methoxybiphenyl

<sup>1</sup>H NMR (500 MHz, CDCl<sub>3</sub>, TMS): δ 7.54–7.53 (m, 4 H), 7.42 (t, 2 H, *J* = 8 Hz), 7.28 (t, 1 H, *J* = 15 Hz), 6.98 (d, 2 H, *J* = 5 Hz), 3.85 (s, 3 H); <sup>13</sup>C NMR (125 MHz, CDCl<sub>3</sub>, TMS): δ 161.5, 139, 129, 128.8, 128.5, 127.6, 127.5, 127.37, 127.34, 127.32, 127.30, 114.7, 57.6; MS (EI): *m/z* (%) = 184 (100) [M<sup>+</sup>].

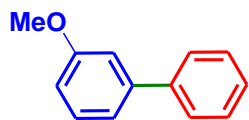

### 3-Methoxybiphenyl

<sup>1</sup>H NMR (500 MHz, CDCl<sub>3</sub>, TMS): δ 7.62–7.59 (m, 2 H), 7.49–7.45 (m, 2 H), 7.41–7.38 (m, 2 H), 7.19–7.18 (m, 1 H), 7.14–7.12 (m, 1 H), 6.90 (ddd, 1 H, *J* = 10, 7.5, 1.5 Hz), 3.86 (s, 3 H); <sup>13</sup>C NMR (125 MHz, CDCl<sub>3</sub>, TMS): δ 161.7, 139, 129, 128.8, 128.5, 127.6, 127.5, 127.37, 127.34, 127.32, 127.2, 113, 57; MS (EI): *m/z* (%) = 184 (100) [M<sup>+</sup>].

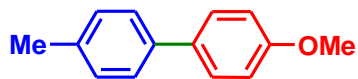

### 4-Methoxy-4'-methylbiphenyl

$^1\text{H}$  NMR (500 MHz,  $\text{CDCl}_3$ , TMS):  $\delta$  7.51 (d, 2 H,  $J = 8.0$  Hz), 7.45 (d, 2 H,  $J = 8.0$  Hz), 7.22 (d, 2 H,  $J = 8.0$  Hz), 6.97 (d, 2 H,  $J = 8.5$  Hz), 3.84 (s, 3 H), 2.38 (s, 3 H);  $^{13}\text{C}$  NMR (125 MHz,  $\text{CDCl}_3$ , TMS): 158.7, 137.8, 136.2, 133.6, 129.3, 127.8, 126.4, 114, 55.2, 20.9; MS (EI):  $m/z$  (%) = 198 (100) [ $\text{M}^+$ ].

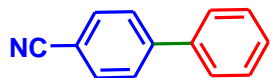

### Biphenyl-4-carbonitrile

$^1\text{H}$  NMR (500 MHz,  $\text{CDCl}_3$ , TMS):  $\delta$  7.73 (d, 2 H,  $J = 8.4$  Hz), 7.69 (d, 2 H,  $J = 8.5$  Hz), 7.58 (t, 2 H,  $J = 4.5$  Hz), 7.48 (t, 2 H,  $J = 7.5$  Hz), 7.42–7.37 (m, 1 H);  $^{13}\text{C}$  NMR (125 MHz,  $\text{CDCl}_3$ , TMS): 145.5, 139.6, 132.5, 129.0, 128.5, 127.6, 127.5, 127.37, 127.34, 127.32, 127.1, 118.8, 110.7; MS (EI):  $m/z$  (%) = 179 (100) [ $\text{M}^+$ ].

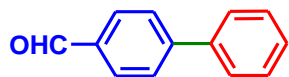

### Biphenyl-4-carbaldehyde

$^1\text{H}$  NMR (500 MHz,  $\text{CDCl}_3$ , TMS):  $\delta$  1.08 (s, 1 H), 7.95 (d, 2 H,  $J = 1.5$  Hz), 7.79 (d, 2 H,  $J = 1.5$  Hz), 7.65 (d, 2 H,  $J = 1.5$  Hz), 7.49 (t, 2 H,  $J = 1.0$  Hz), 7.43 (t, 1 H,  $J = 1.5$  Hz);  $^{13}\text{C}$  NMR (125 MHz,  $\text{CDCl}_3$ , TMS): 192.2, 145.8, 137.6, 133.5, 130.6, 130.3, 129.9, 128.1, 127.9, 127.8, 127.6, 127.5, 127.4; MS (EI):  $m/z$  (%) = 182 (100) [ $\text{M}^+$ ].

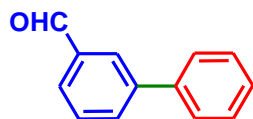

### Biphenyl-3-carbaldehyde

$^1\text{H}$  NMR (500 MHz,  $\text{CDCl}_3$ , TMS):  $\delta$  9.85 (s, 1 H), 8.04 (s, 1 H), 7.68–7.66 (m, 2 H), 7.58–7.55 (m, 1 H), 7.48 (d, 2 H,  $J = 1.0$  Hz), 7.43–7.37 (m, 3 H);  $^{13}\text{C}$  NMR (125 MHz,  $\text{CDCl}_3$ , TMS): 192.4, 145.8, 137.6, 133.57, 133.51, 129.9, 129.8, 129.5, 128.5, 128.3, 127.5, 127.46, 127.43; MS (EI):  $m/z$  (%) = 182 (100) [ $\text{M}^+$ ].

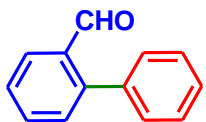

### Biphenyl-2-carbaldehyde

$^1\text{H}$  NMR (500 MHz,  $\text{CDCl}_3$ , TMS):  $\delta$  9.9 (s, 1 H), 8.02 (d, 1 H,  $J = 1$  Hz), 7.68–7.66 (m, 2 H), 7.50–7.41 (m, 6 H);  $^{13}\text{C}$  NMR (125 MHz,  $\text{CDCl}_3$ , TMS): 192.3, 145.8, 137.6, 133.57, 133.50, 130.2, 129.9, 129.5, 127.9, 127.8, 127.6, 127.5, 127.4; MS (EI):  $m/z$  (%) = 182 (100) [ $\text{M}^+$ ].

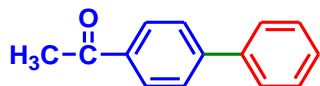

### 1-Biphenyl-4-yl-ethanone

$^1\text{H}$  NMR (500 MHz,  $\text{CDCl}_3$ , TMS):  $\delta$  8.04 (d, 2 H,  $J = 7.0$  Hz), 7.69 (d, 2 H,  $J = 5.0$  Hz), 7.63 (t, 2 H,  $J = 5.5$  Hz), 7.49 (t, 2 H,  $J = 7.5$  Hz), 7.42–7.40 (m, 1 H), 2.64 (s, 3 H);  $^{13}\text{C}$  NMR (125 MHz,  $\text{CDCl}_3$ , TMS): 197.7, 145.6, 139.7, 135.7, 128.86, 128.82, 128.14, 127.18, 127.13, 26.6; MS (EI):  $m/z$  (%) = 196 (51) [ $\text{M}^+$ ].

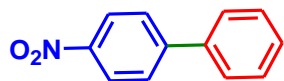

### 4-Nitrobiphenyl

$^1\text{H}$  NMR (500 MHz,  $\text{CDCl}_3$ , TMS):  $\delta$  8.31 (d, 2 H,  $J = 7.5$  Hz), 7.75 (d, 2 H,  $J = 9.0$  Hz), 7.64 (d, 2 H,  $J = 7.0$  Hz), 7.51 (t, 2 H,  $J = 7.5$  Hz), 7.46 (t, 1 H,  $J = 7.2$  Hz);  $^{13}\text{C}$  NMR (125 MHz,  $\text{CDCl}_3$ , TMS): 147.6, 142.7, 135.7, 128.86, 128.82, 128.14, 127.92, 127.18; MS (EI):  $m/z$  (%) = 199 (100)  $[\text{M}^+]$ .

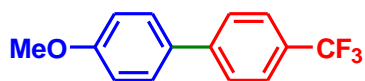

### 4-Methoxy-4'-trifluoromethylbiphenyl

$^1\text{H}$  NMR (500 MHz,  $\text{CDCl}_3$ , TMS):  $\delta$  7.54 (d, 2 H,  $J = 3.0$  Hz), 7.5 (d, 2 H,  $J = 2.0$  Hz), 7.19 (d, 2 H,  $J = 7.5$  Hz), 6.96 (d, 2 H,  $J = 2$  Hz), 3.84 (s, 3 H);  $^{13}\text{C}$  NMR (125 MHz,  $\text{CDCl}_3$ , TMS): 161.3, 139, 129, 128.8, 128.5, 127.6, 127.5, 127.37, 127.34, 127.32, 127.29, 119.06, 114.06, 57.1; MS (EI):  $m/z$  (%) = 252 (100)  $[\text{M}^+]$ .

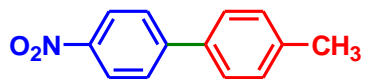

### 4'-Methyl-4-nitrobiphenyl

<sup>1</sup>H NMR (500 MHz, CDCl<sub>3</sub>, TMS): δ 8.29 (d, 2 H, *J* = 2.5 Hz), 7.72 (d, 2 H, *J* = 4.5 Hz), 7.35 (d, 2 H, *J* = 8.5 Hz), 7.29 (d, 2 H, *J* = 11.5 Hz), 2.42 (s, 3 H); <sup>13</sup>C NMR (125 MHz, CDCl<sub>3</sub>, TMS): 147.4, 146.7, 138.9, 135.7, 129.7, 127.3, 127.1, 123.9, 21.1; MS (EI): *m/z* (%) = 213 (100) [M<sup>+</sup>].

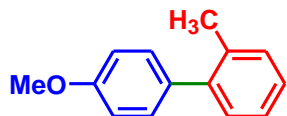

### 4'-Methoxy-2-methylbiphenyl

<sup>1</sup>H NMR (500 MHz, CDCl<sub>3</sub>, TMS): δ 7.30–7.22 (m, 6 H), 6.90 (d, 2 H, *J* = 2.0 Hz), 3.8 (s, 3 H), 2.2 (s, 3 H); <sup>13</sup>C NMR (125 MHz, CDCl<sub>3</sub>, TMS): 158.3, 141.4, 135.3, 134.2, 130.18, 130.14, 129.7, 126.8, 125.6, 113.3, 55.1, 20.4; MS (EI): *m/z* (%) = 198 (100) [M<sup>+</sup>].



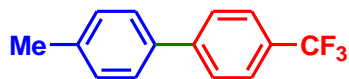

### 4'-Methyl-4-trifluoromethylbiphenyl

$^1\text{H}$  NMR (500 MHz,  $\text{CDCl}_3$ , TMS):  $\delta$  7.67 (s, 4 H), 7.50 (d, 2 H,  $J = 8.1$  Hz), 7.29 (d, 2 H,  $J = 8.0$  Hz), 2.41 (s, 3 H);  $^{13}\text{C}$  NMR (125 MHz,  $\text{CDCl}_3$ , TMS): 139, 136.8, 133, 129, 128.8, 128.5, 127.6, 127.5, 127.37, 127.34, 127.32, 127.29, 119, 20; MS (EI):  $m/z$  (%) = 236 (100)  $[\text{M}^+]$ .

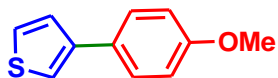

### 3-(4-Methoxy-phenyl)-thiophene

$^1\text{H}$  NMR (500 MHz,  $\text{CDCl}_3$ , TMS):  $\delta$  7.52 (d, 2 H,  $J = 1.5$  Hz), 7.38–7.34 (m, 3 H), 6.94 (d, 2 H,  $J = 7.0$  Hz), 3.84 (s, 3 H);  $^{13}\text{C}$  NMR (125 MHz,  $\text{CDCl}_3$ , TMS):  $\delta$  158.7, 141.8, 128.6, 127.4, 125.9, 123.7, 114, 55.2; MS (EI):  $m/z$  (%) = 190 (100)  $[\text{M}^+]$ .

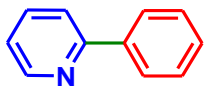

## 2-Phenylpyridine

$^1\text{H}$  NMR (500 MHz,  $\text{CDCl}_3$ , TMS):  $\delta$  8.3 (s, 1 H), 7.73–7.70 (m, 2 H), 7.48–7.43 (m, 2 H), 7.36–7.12 (m, 3 H), 6.7–6.6 (m, 1 H);  $^{13}\text{C}$  NMR (125 MHz,  $\text{CDCl}_3$ , TMS):  $\delta$  157.3, 149.5, 139.2, 136.6, 128.7, 128.5, 126.8, 121.9, 120.4; MS (EI)  $m/z$  155 ( $\text{M}^+$ , 100%); MS (EI):  $m/z$  (%) = 155 (100) [ $\text{M}^+$ ].

## References

1. L. Liu, Y. Zhang and Y. Wang, *J. Org. Chem.*, 2005, **70**, 6122–6125.
2. L. Liu, Y. Zhang and B. Xin, *J. Org. Chem.*, 2006, **71**, 3994–3997.
3. Y. M. A. Yamada, K. Takeda, H. Takahashi and S. Ikegami, *J. Org. Chem.*, 2003, **68**, 7733–7741.
4. O. Navarro, H. Kaur, P. Mahjoor and S. P. Nolan, *J. Org. Chem.*, 2004, **69**, 3173–3180.
5. X.-H. Fan and L.-M. Yang, *Eur. J. Org. Chem.*, 2011, 1467–1471.

6. Y. Kitamura, S. Sako, T. Udzu, A. Tsutsui, T. Maegawa, Y. Monguchi and H. Sajiki, *Chem. Commun.*, 2007, 5069–5071.
7. R. Zhong, A. Pothig, Y. Feng, K. Riener, W. A. Herrmann and F. E. Kuhn, *Green Chem.*, 2014, **16**, 4955–4962.
8. J. Han, Y. Liu and R. Guo, *J. Am. Chem. Soc.*, 2009, **131**, 2060–2061.
9. C. Baillie, L. Zhang and J. Xiao, *J. Org. Chem.*, 2004, **69**, 7779–7782.
10. J. V. Kingston and J. G. Verkade, *J. Org. Chem.*, 2007, **72**, 2816–2822.
11. S. C. Sau, S. Santra, T. K. Sen, S. K. Mandal and D. Koley, *Chem. Commun.*, 2012, **48**, 555–557.
12. S. Li, Y. Lin, J. Cao and S. Zhang, *J. Org. Chem.*, 2007, **72**, 4067–4072.
13. T. Fujihara, S. Yoshida, J. Terao and Y. Tsuji, *Org. Lett.*, 2009, **11**, 2121–2124.
14. C. Song, Y. Ma, Q. Chai, C. Ma, W. Jiang and M. B. Andrus, *Tetrahedron*, 2005, **61**, 7438–7446.
15. D.-H. Lee and M.-J. Jin, *Org. Lett.*, 2011, **13**, 252–255.
16. C. M. So, C. C. Yeung, C. P. Lau and F. Y. Kwong, *J. Org. Chem.*, 2008, **73**, 7803–7806.
17. H. Yang, Y. Wang, Y. Qin, Y. Chong, Q. Yang, G. Li, L. Zhang and W. Li, *Green Chem.*, 2011, **13**, 1352–1361.
18. G. A. Molander, S. L. J. Trice and S. M. Kennedy, *J. Org. Chem.*, 2012, **77**, 8678–8688.

19. T. Hoshi, T. Honma, A. Mori, M. Konishi, T. Sato, H. Hagiwara and T. Suzuki, *J. Org. Chem.*, 2013, **78**, 11513–11524.
20. Z. Guan, J. Hu, Y. Gu, H. Zhang, G. Lia and T. Li, *Green Chem.*, 2012, **14**, 1964–1970.
21. V. Kairouz and A. R. Schmitzer, *Green Chem.*, 2014, **16**, 3117–3124.
22. J.-P. Wan, C. Wang, R. Zhou and Y. Liu, *RSC Adv.*, 2012, **2**, 8789–8792.

Name of Sample: SB-1  
Spectrum No: 3570

<sup>1</sup>H NMR spectra of

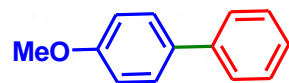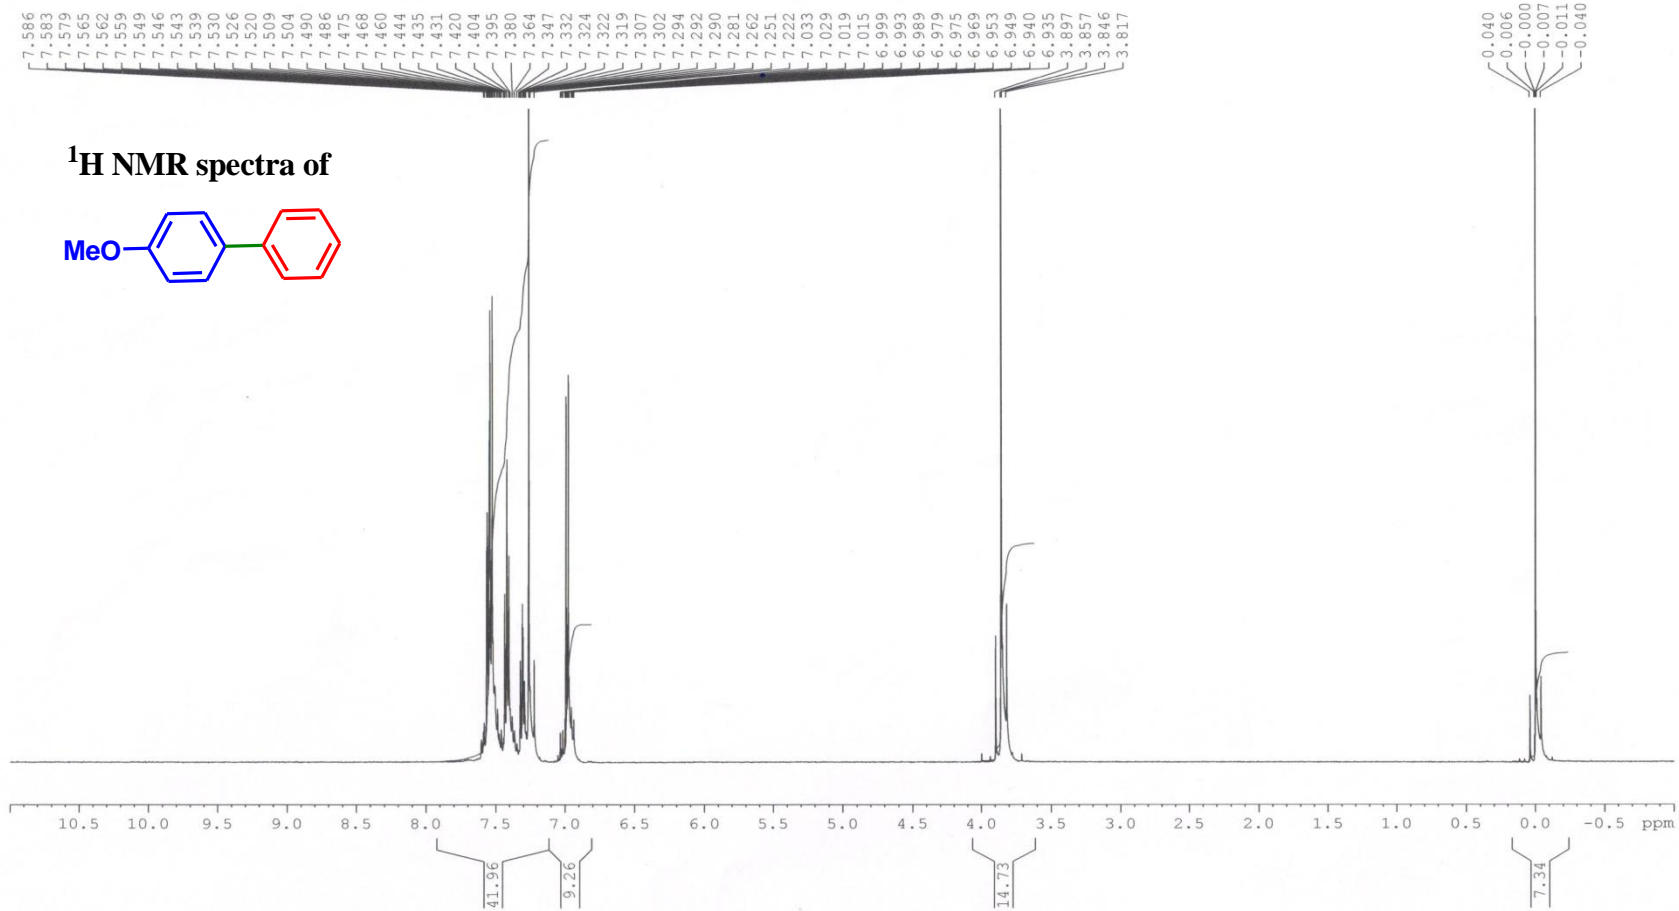

**<sup>13</sup>C NMR spectra of**

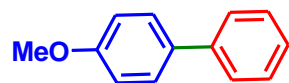

Name of Sample: S-2  
Spectrum No : 2522

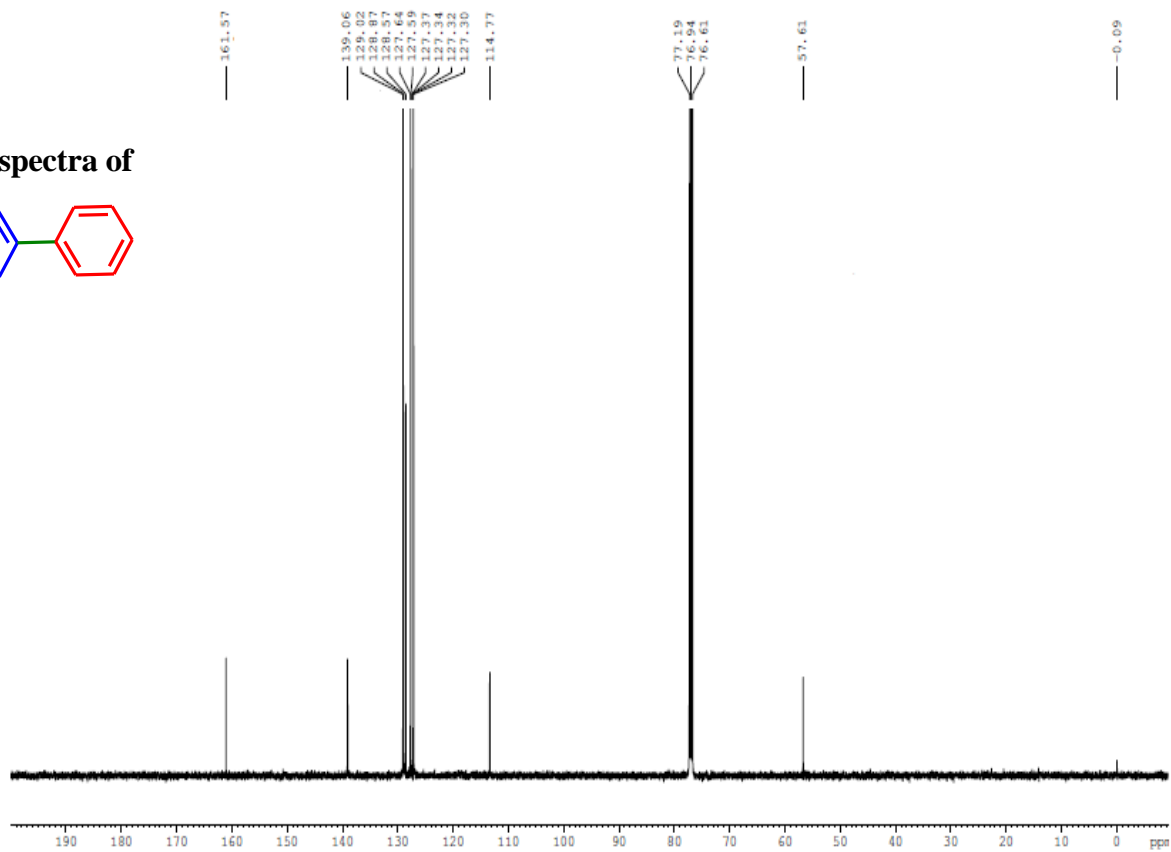

Name of Sample: SB-7  
Spectrum No.: 3757

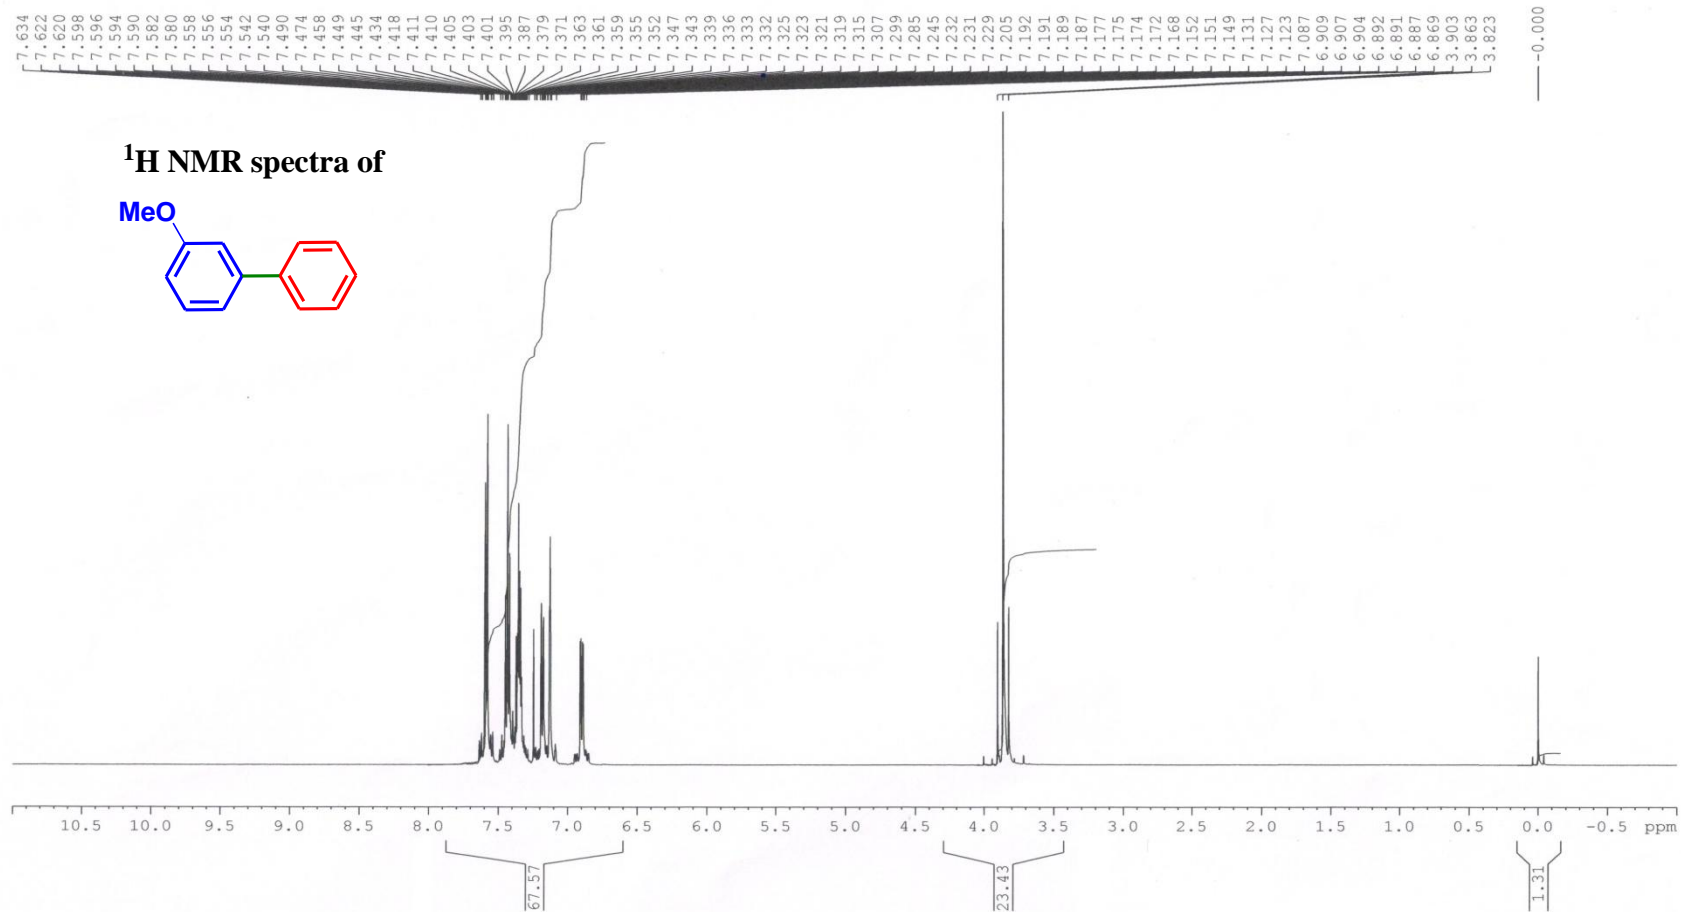

Name of Sample:S-21  
Spectrum No:2527

<sup>13</sup>C NMR spectra of

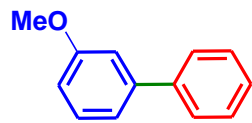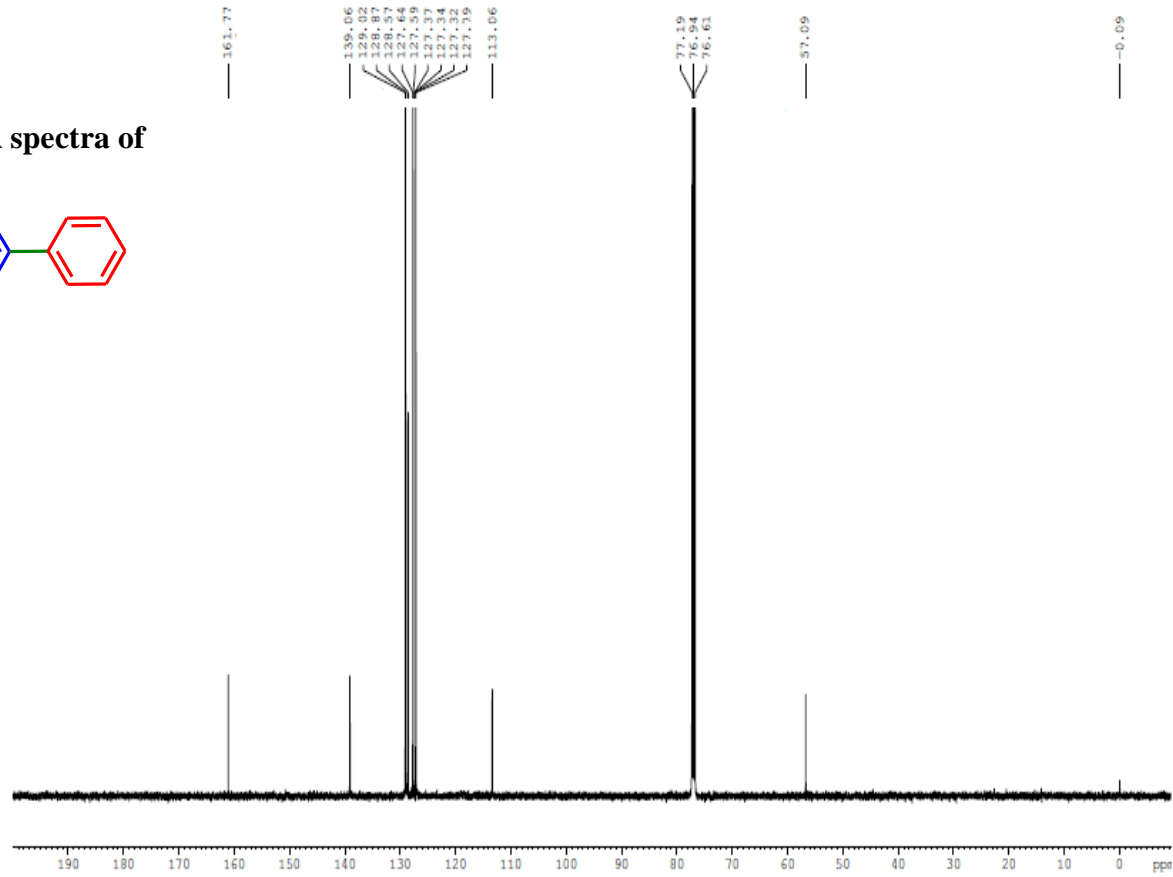



Name of Sample: S-3  
Spectrum No: 2562

<sup>1</sup>H NMR spectra of

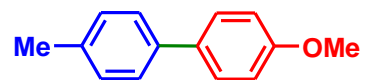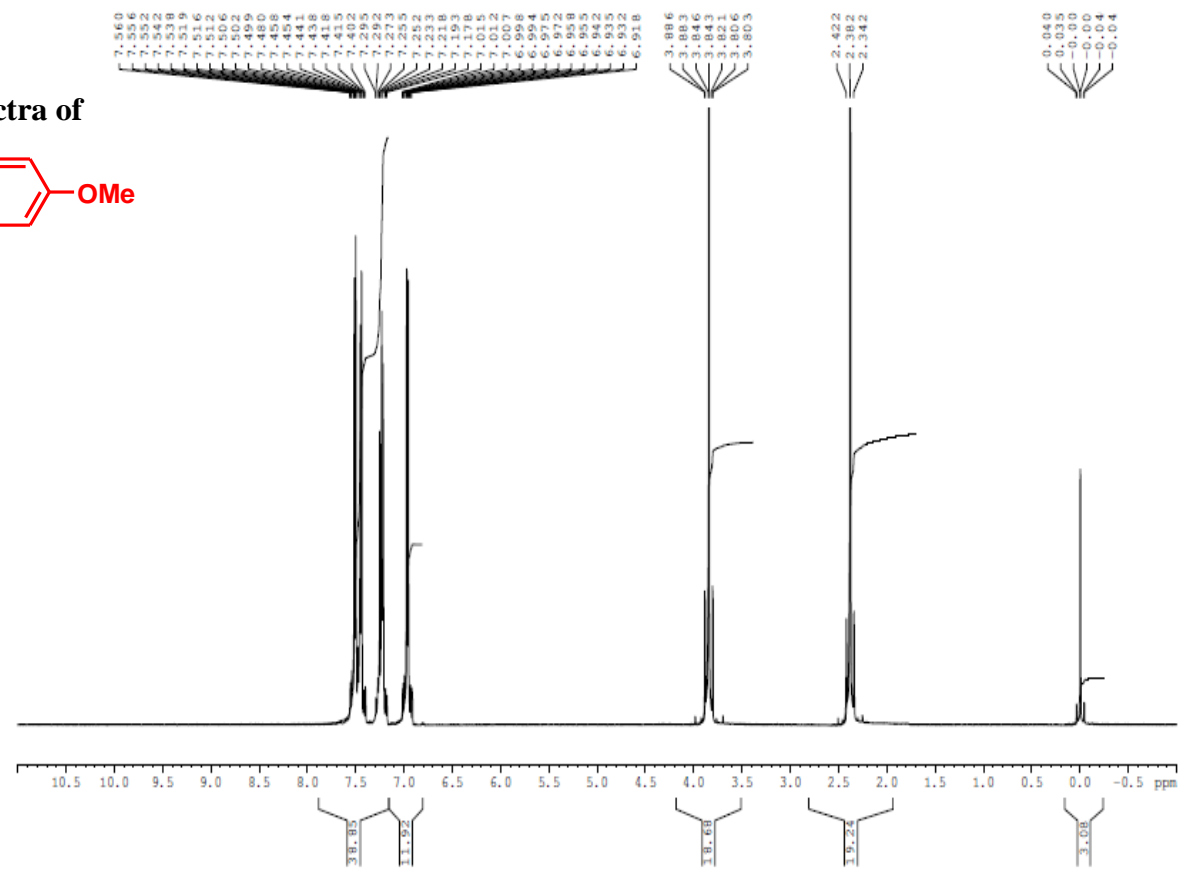

Name of Sample: S-4  
Spectrum No:2551

<sup>13</sup>C NMR spectra of

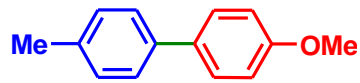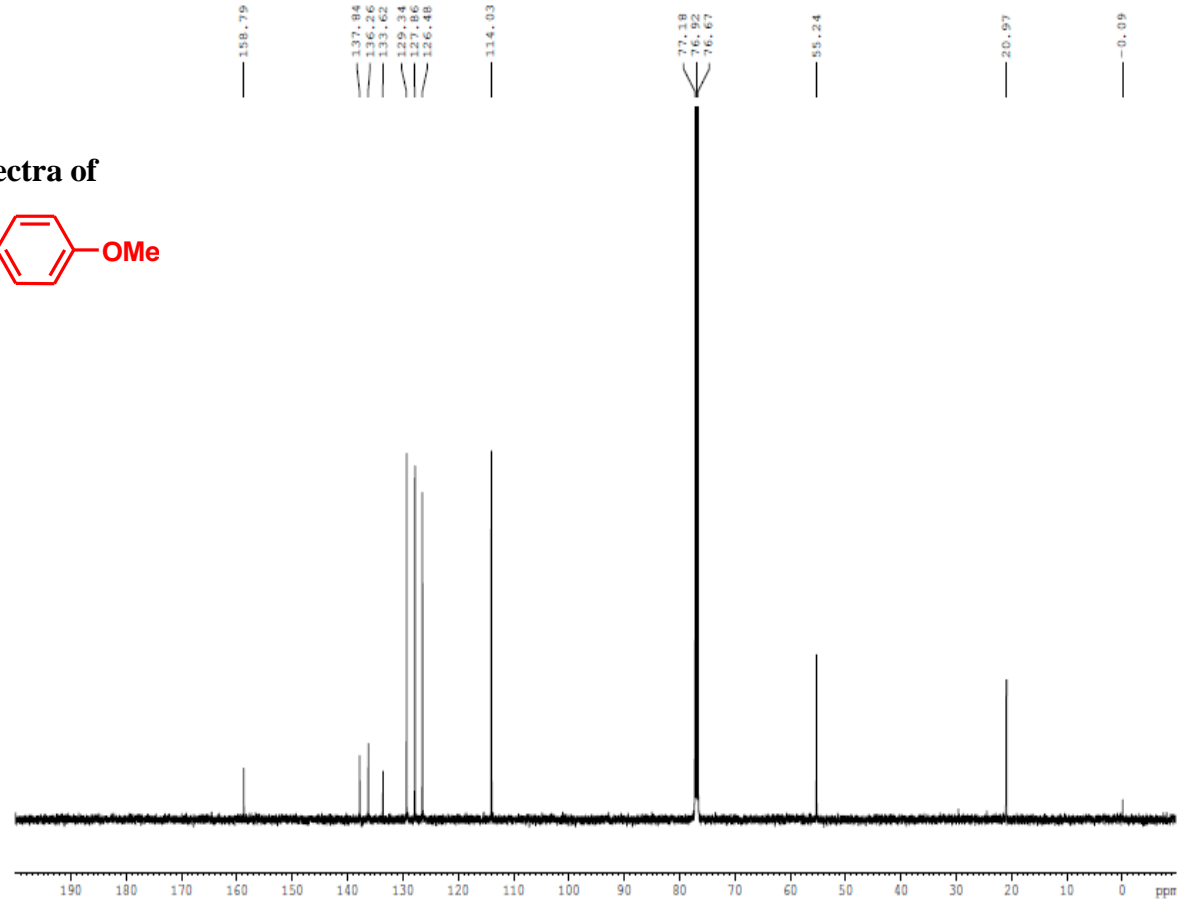

Name of Sample: S-4  
Spectrum No: 2437

<sup>1</sup>H NMR spectra of

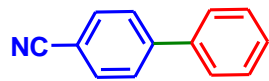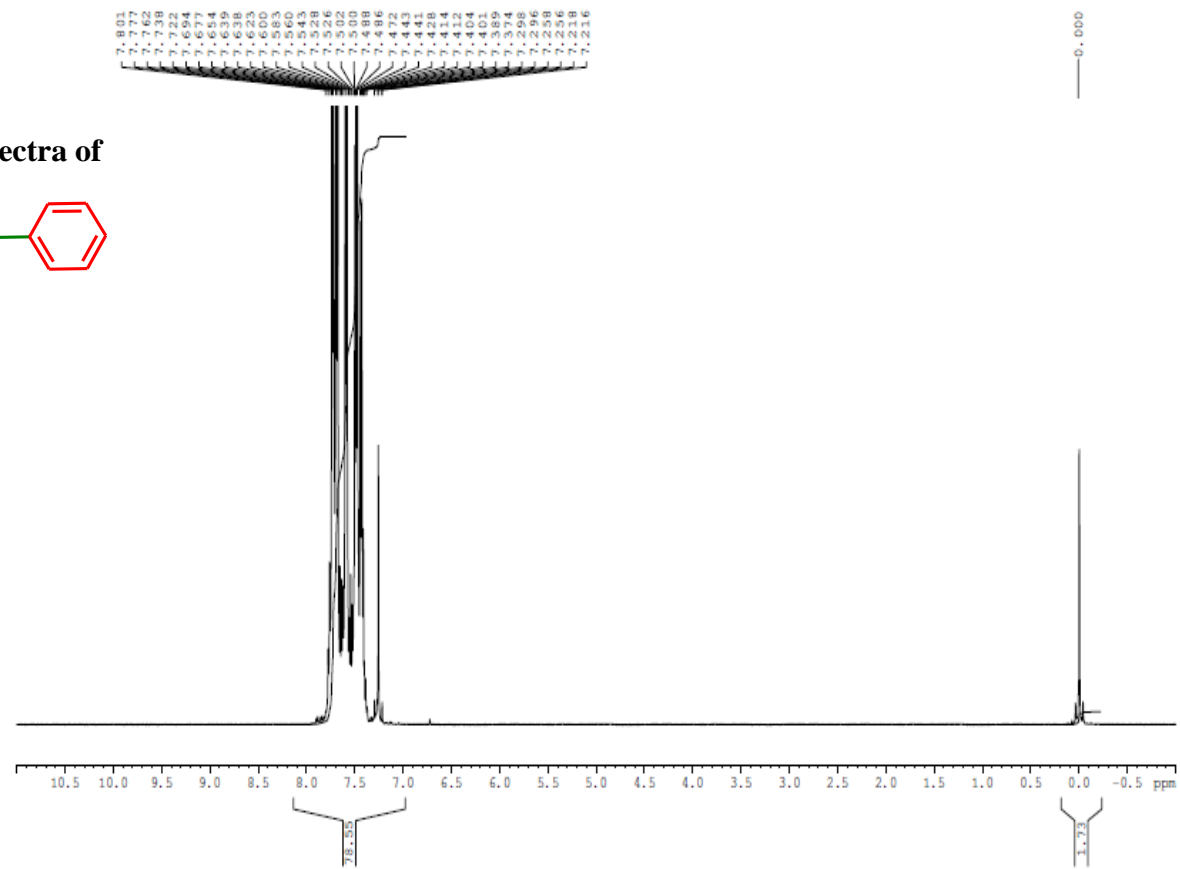

Name of Sample: S-7a  
Spectrum No: 2560

<sup>13</sup>C NMR spectra of

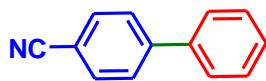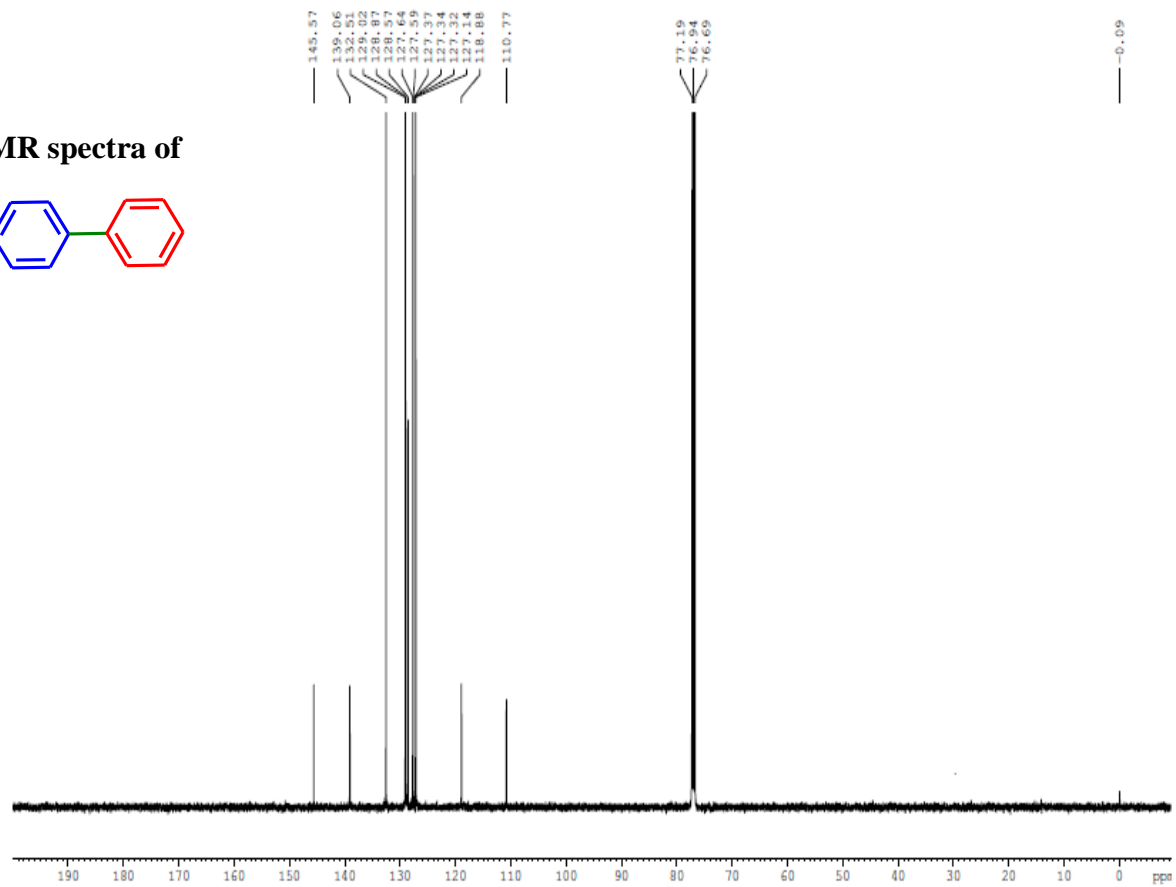

Name of Sample: SB-4  
Spectrum No: 3642

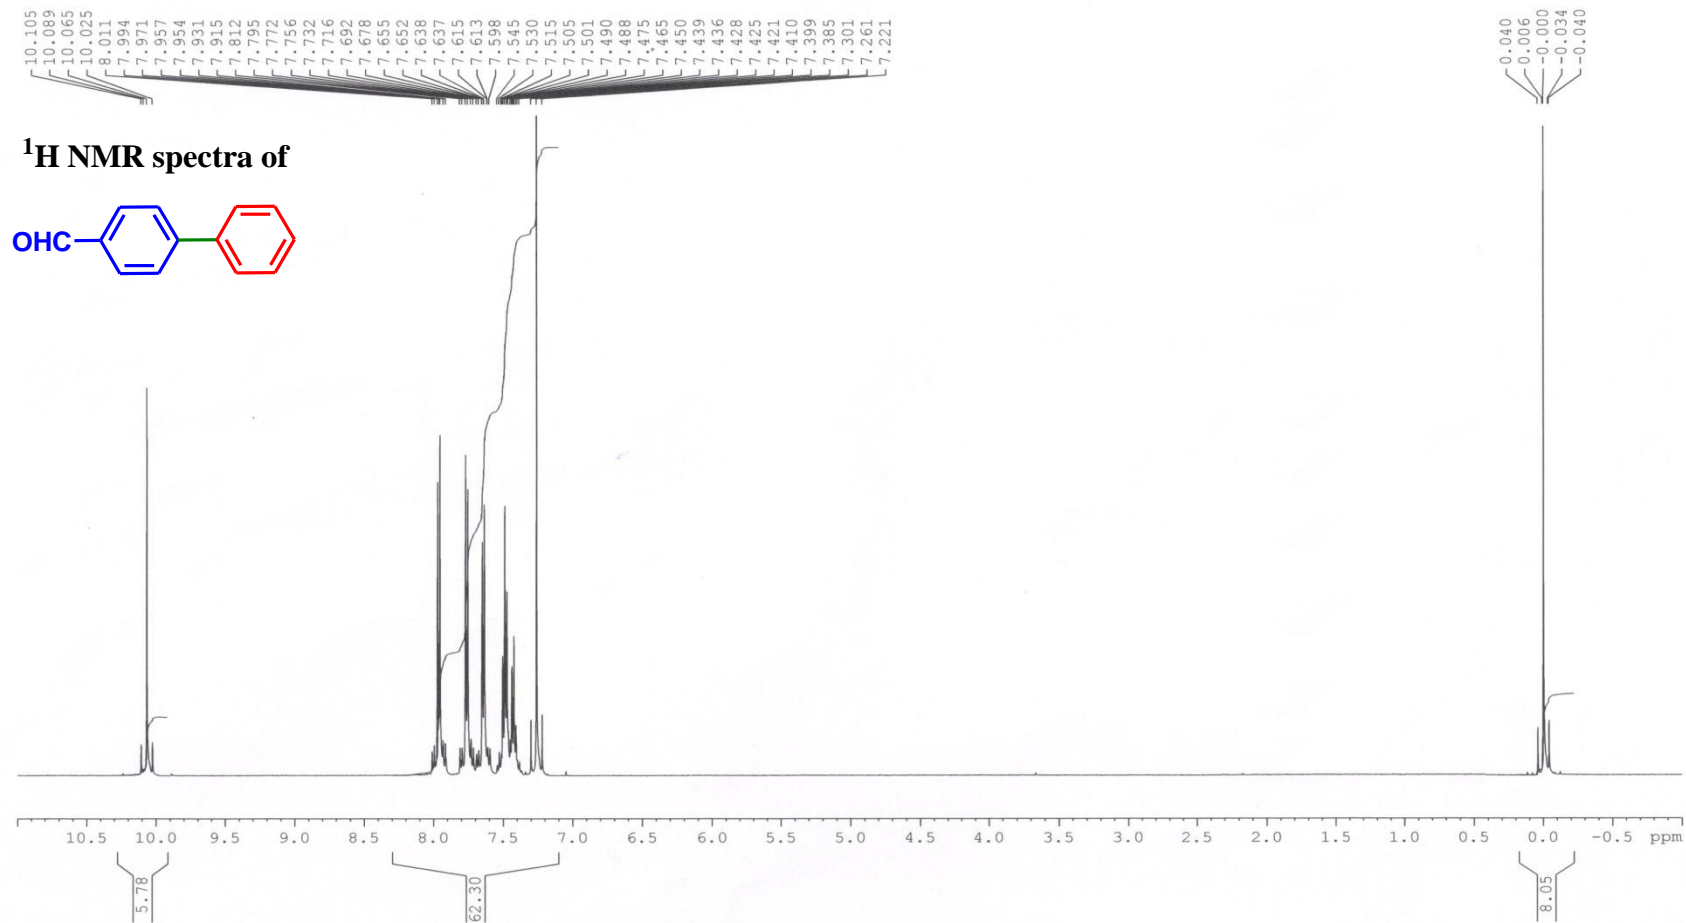





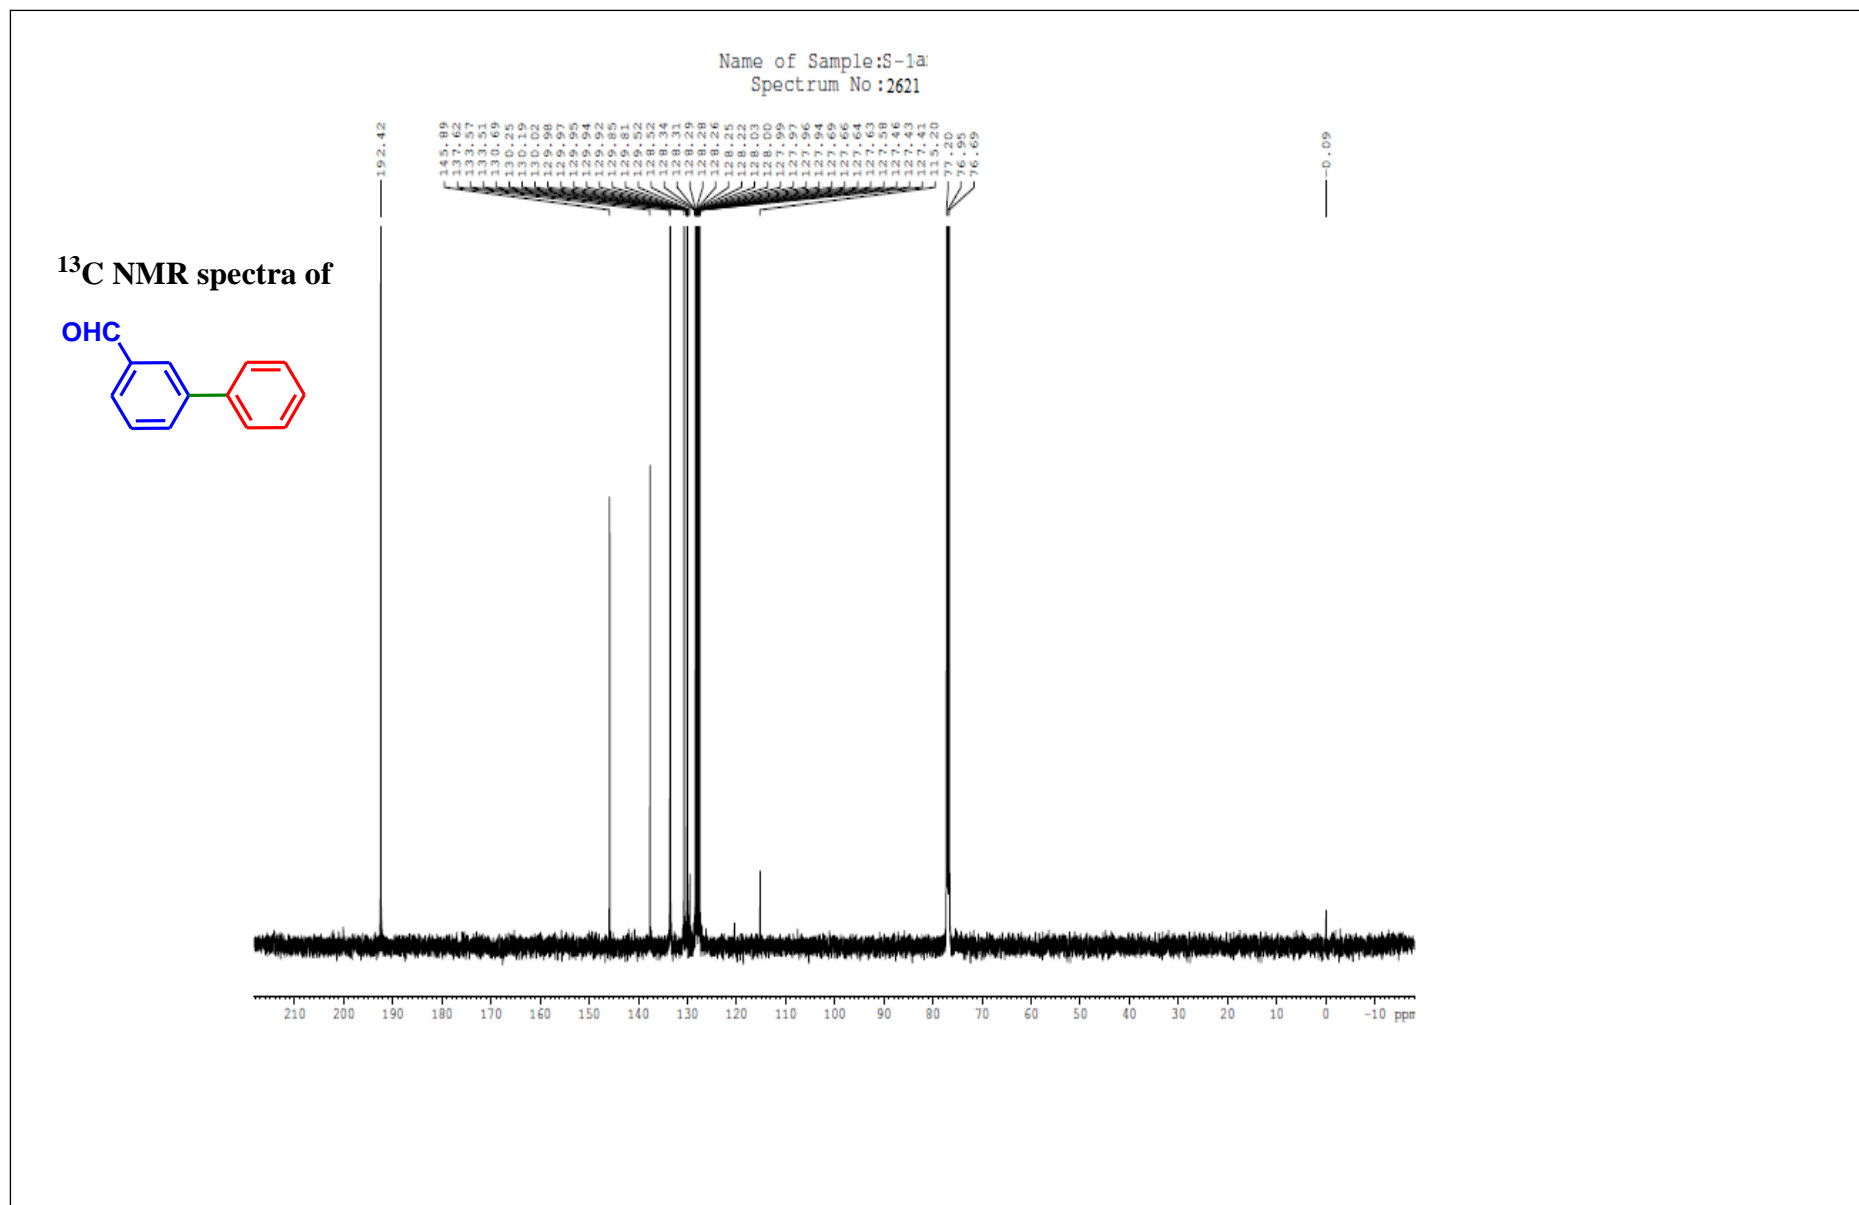





<sup>13</sup>C NMR spectra of

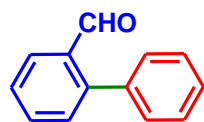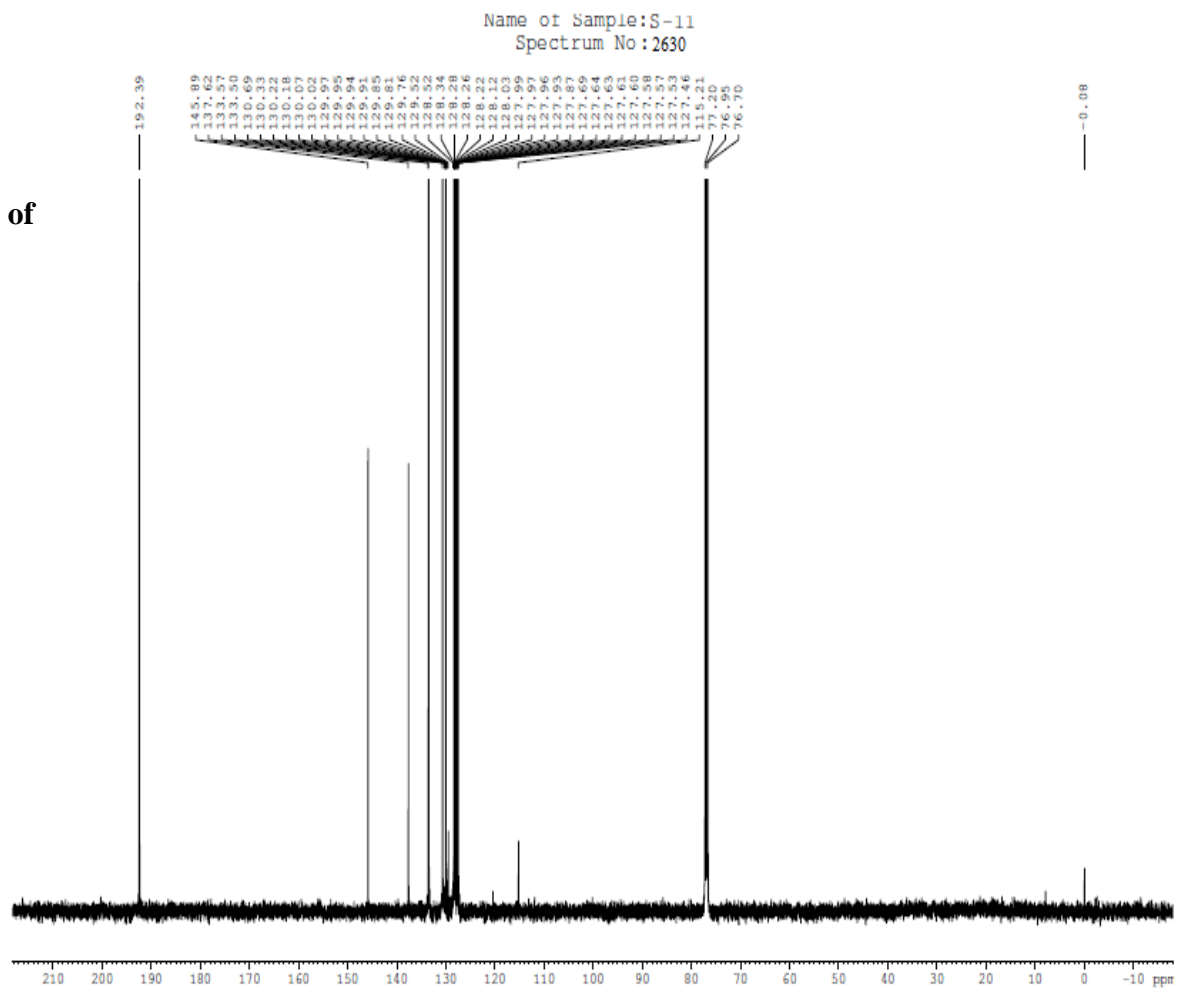

Name of Sample: SB-5  
Spectrum No.: 3745

<sup>1</sup>H NMR spectra of

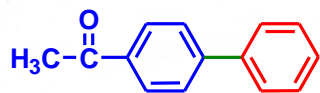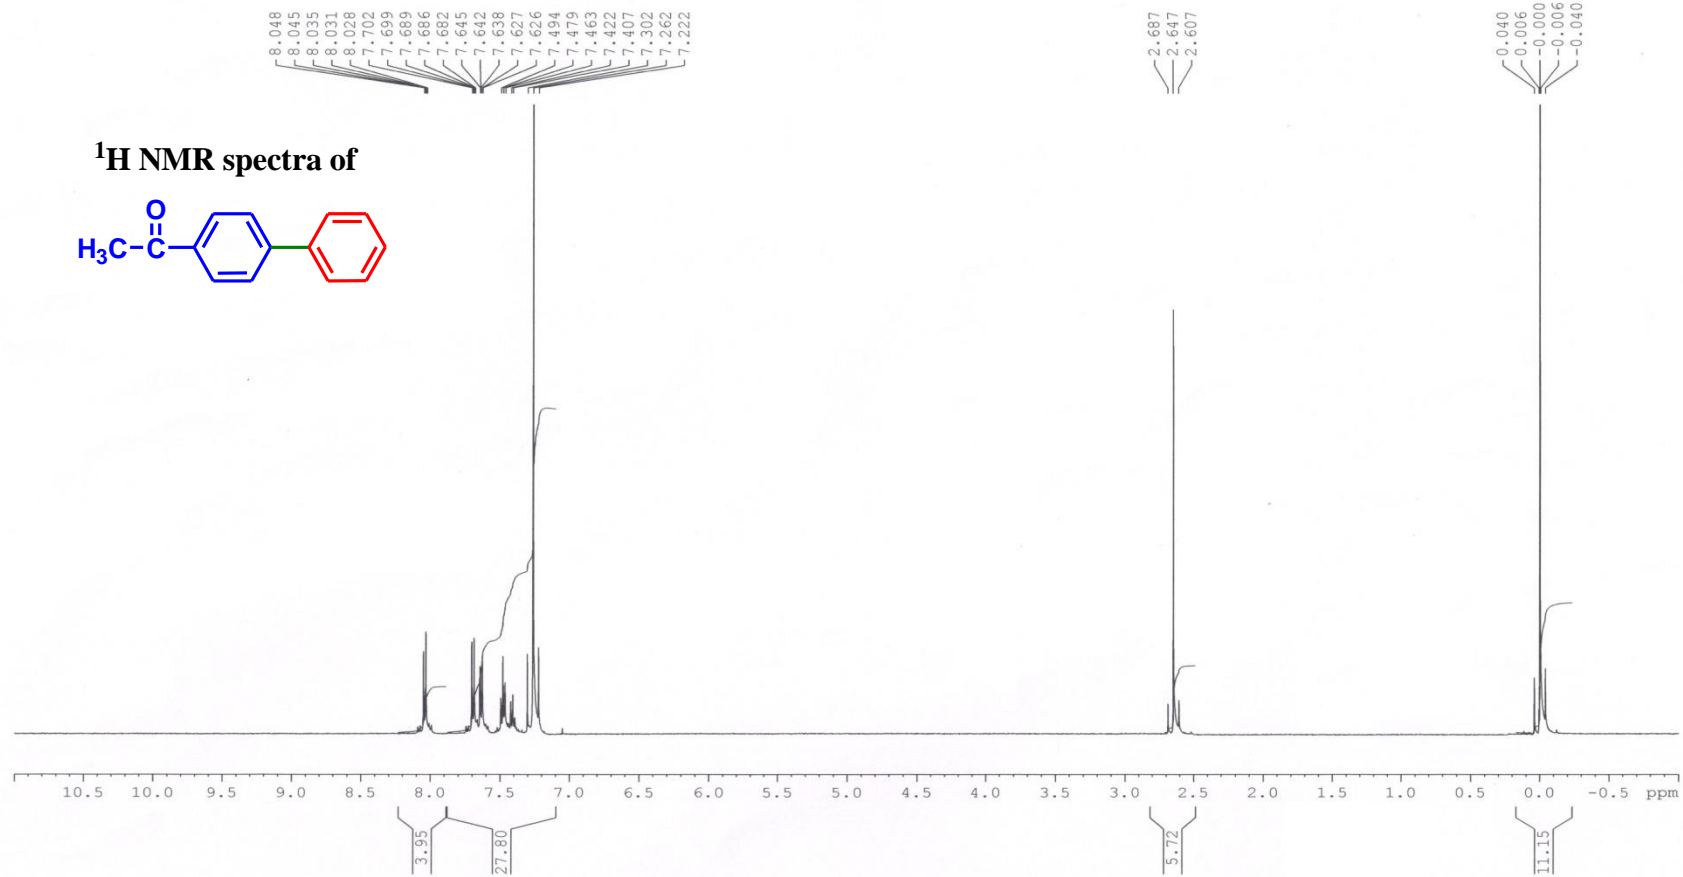

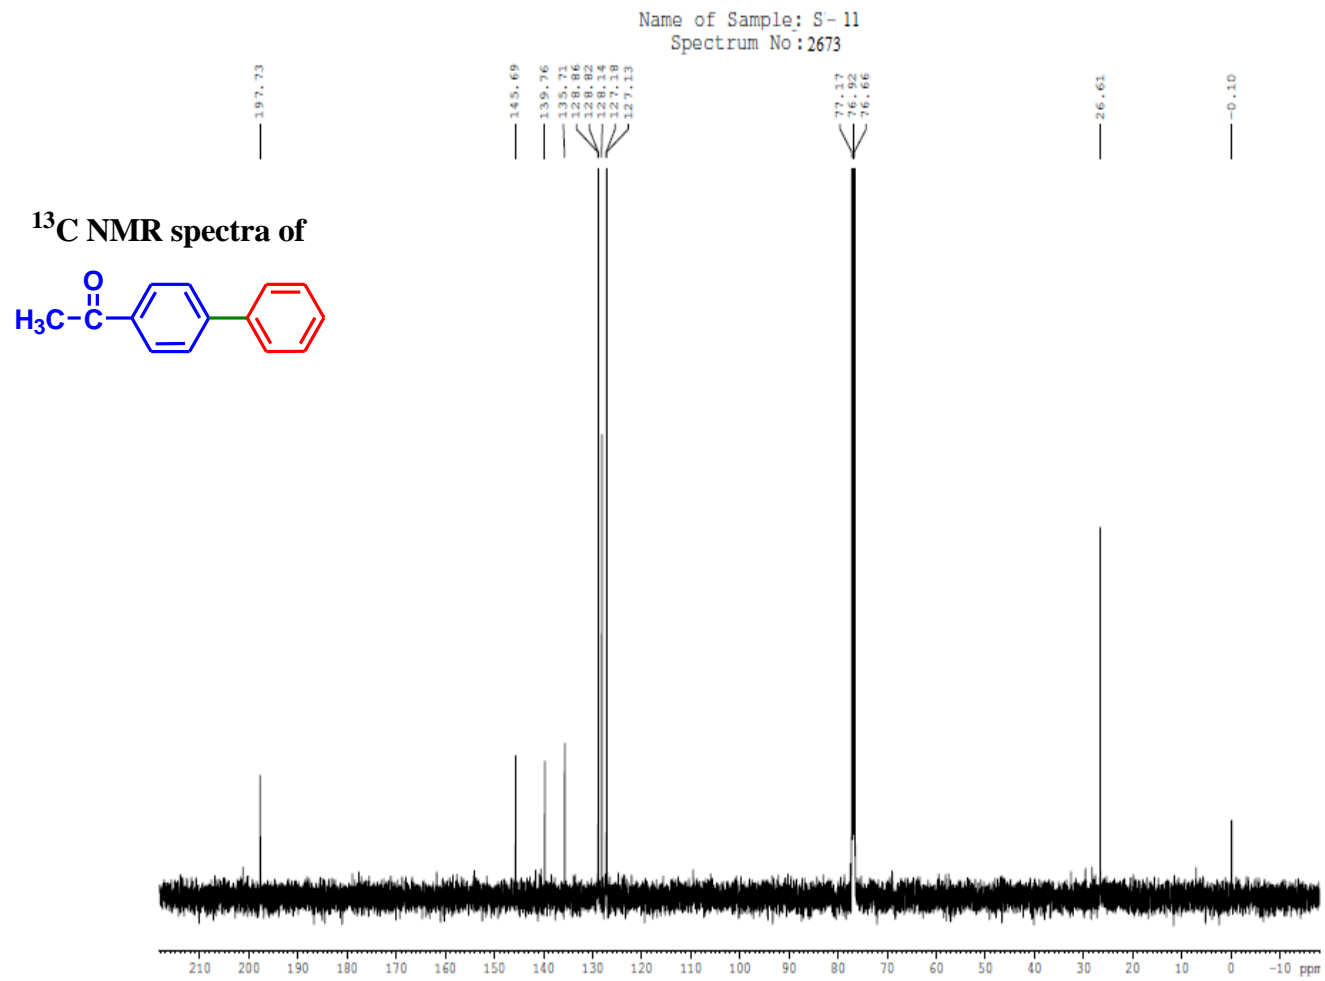

Name of Sample: SB-3  
Spectrum No: 3641

8.312  
8.301  
8.297  
8.293  
8.275  
8.272  
8.258  
7.793  
7.790  
7.779  
7.776  
7.758  
7.753  
7.749  
7.739  
7.736  
7.731  
7.719  
7.713  
7.710  
7.700  
7.696  
7.681  
7.678  
7.662  
7.641  
7.638  
7.623  
7.622  
7.601  
7.598  
7.583  
7.582  
7.559  
7.545  
7.529  
7.519  
7.516  
7.505  
7.503  
7.489  
7.479  
7.465  
7.455  
7.451  
7.446  
7.439  
7.437  
7.426  
7.411  
7.301  
7.261  
7.222

0.040  
0.001  
-0.000  
-0.006  
-0.040

<sup>1</sup>H NMR spectra of

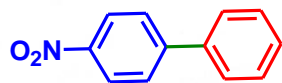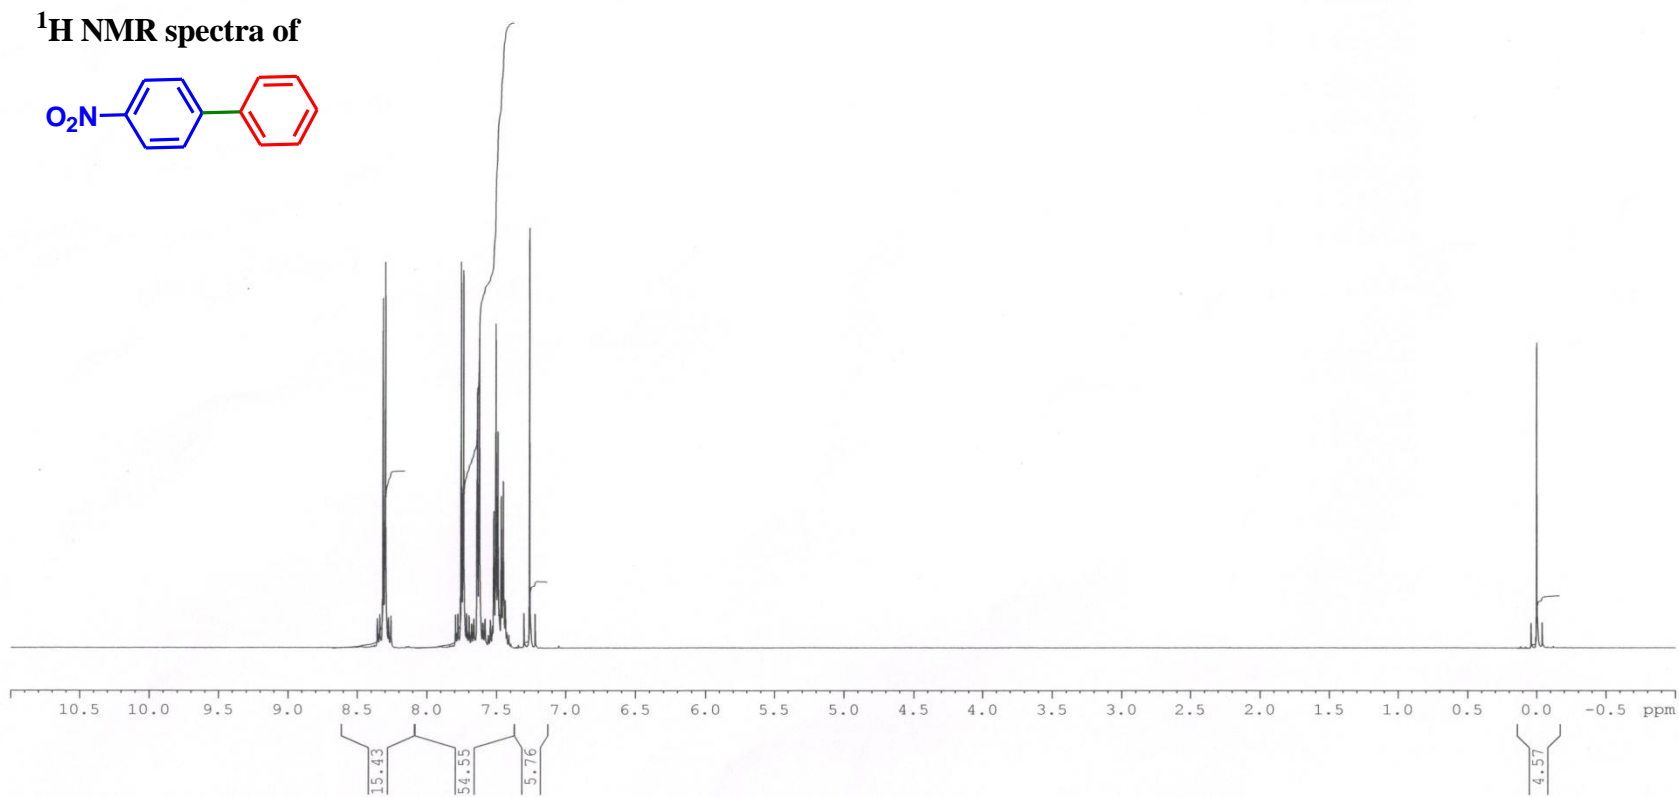

**$^{13}\text{C}$  NMR spectra of**

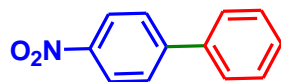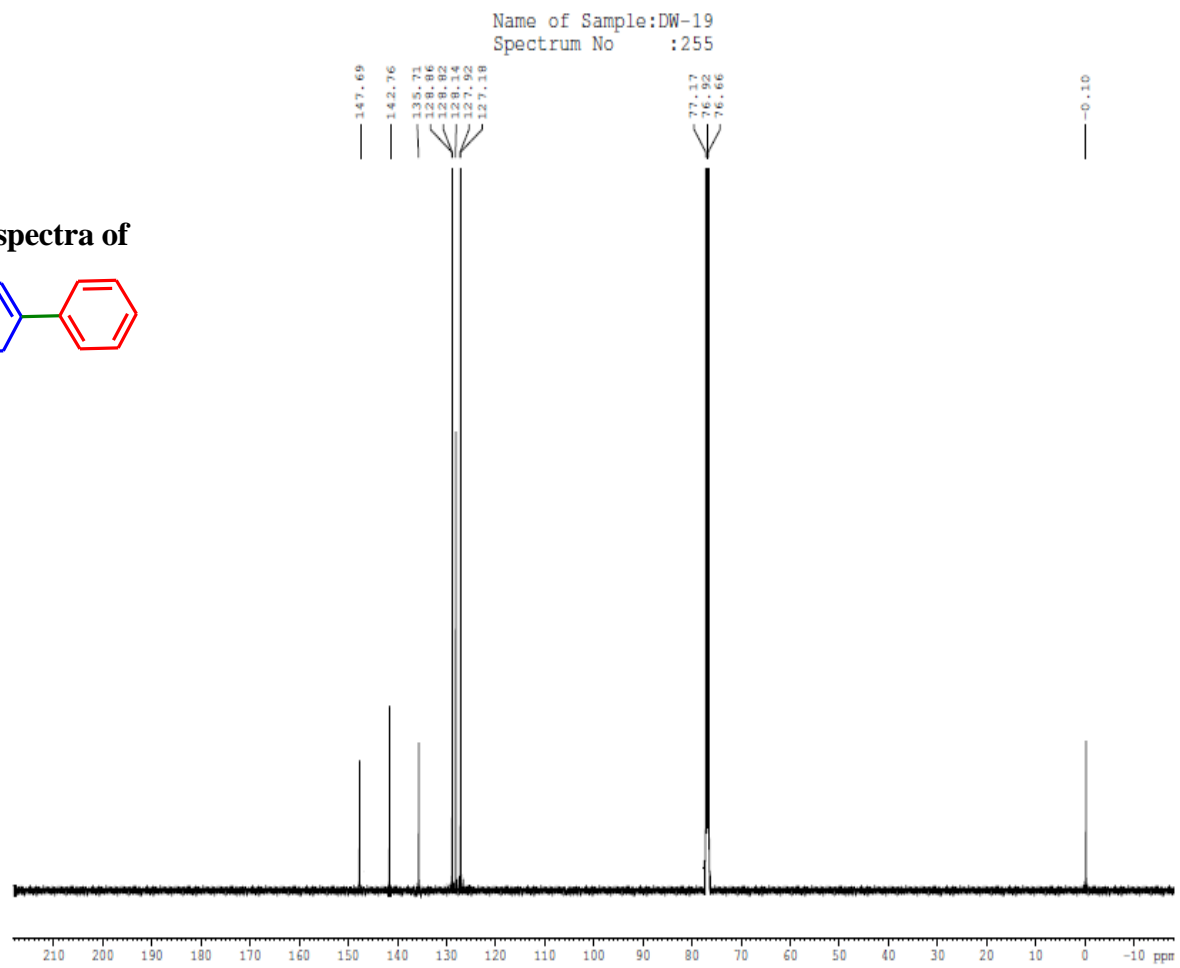

Name of Sample: SB-2  
Spectrum No: 3613

<sup>1</sup>H NMR spectra of

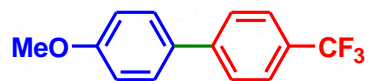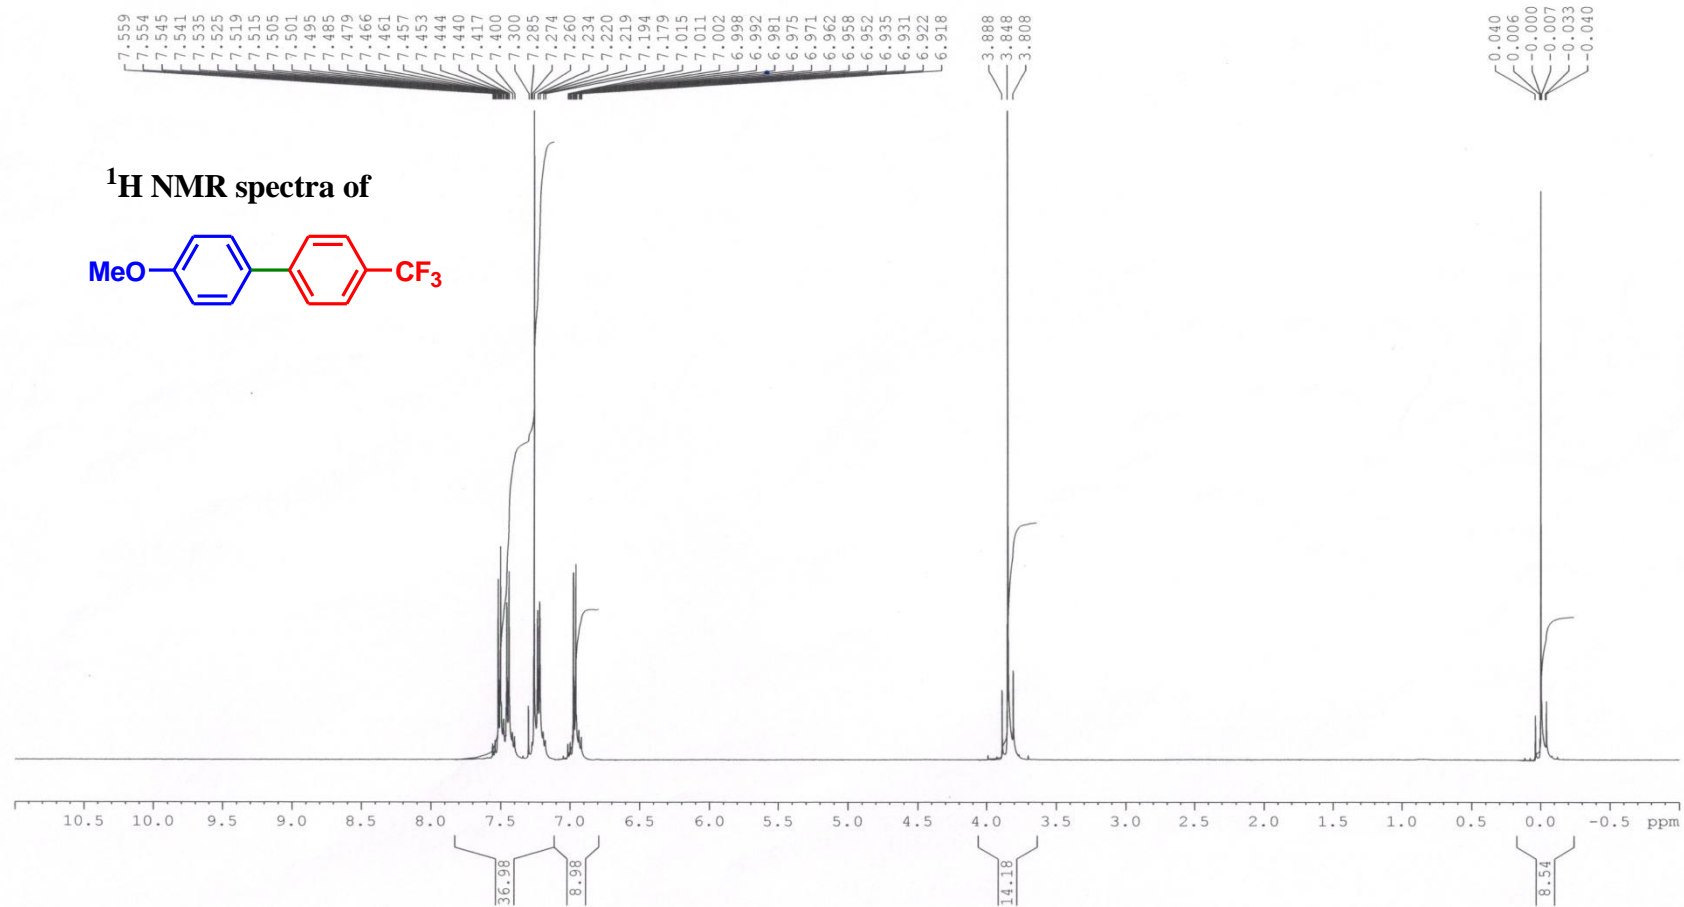

Name of Sample: S-25  
Spectrum No: 2577

<sup>13</sup>C NMR spectra of

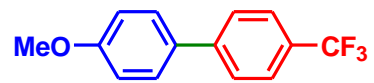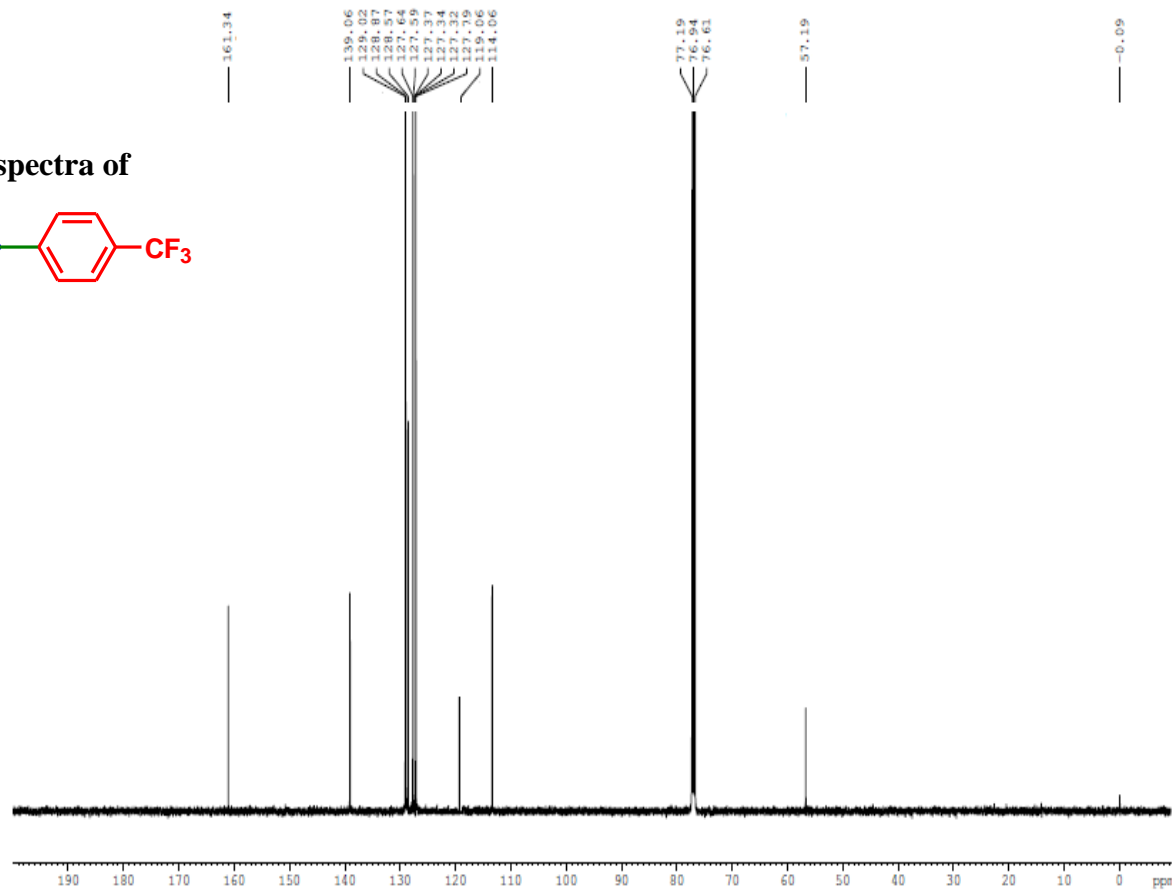



Name of Sample: SB-10  
Spectrum No : 3861

<sup>1</sup>H NMR spectra of

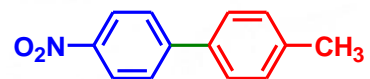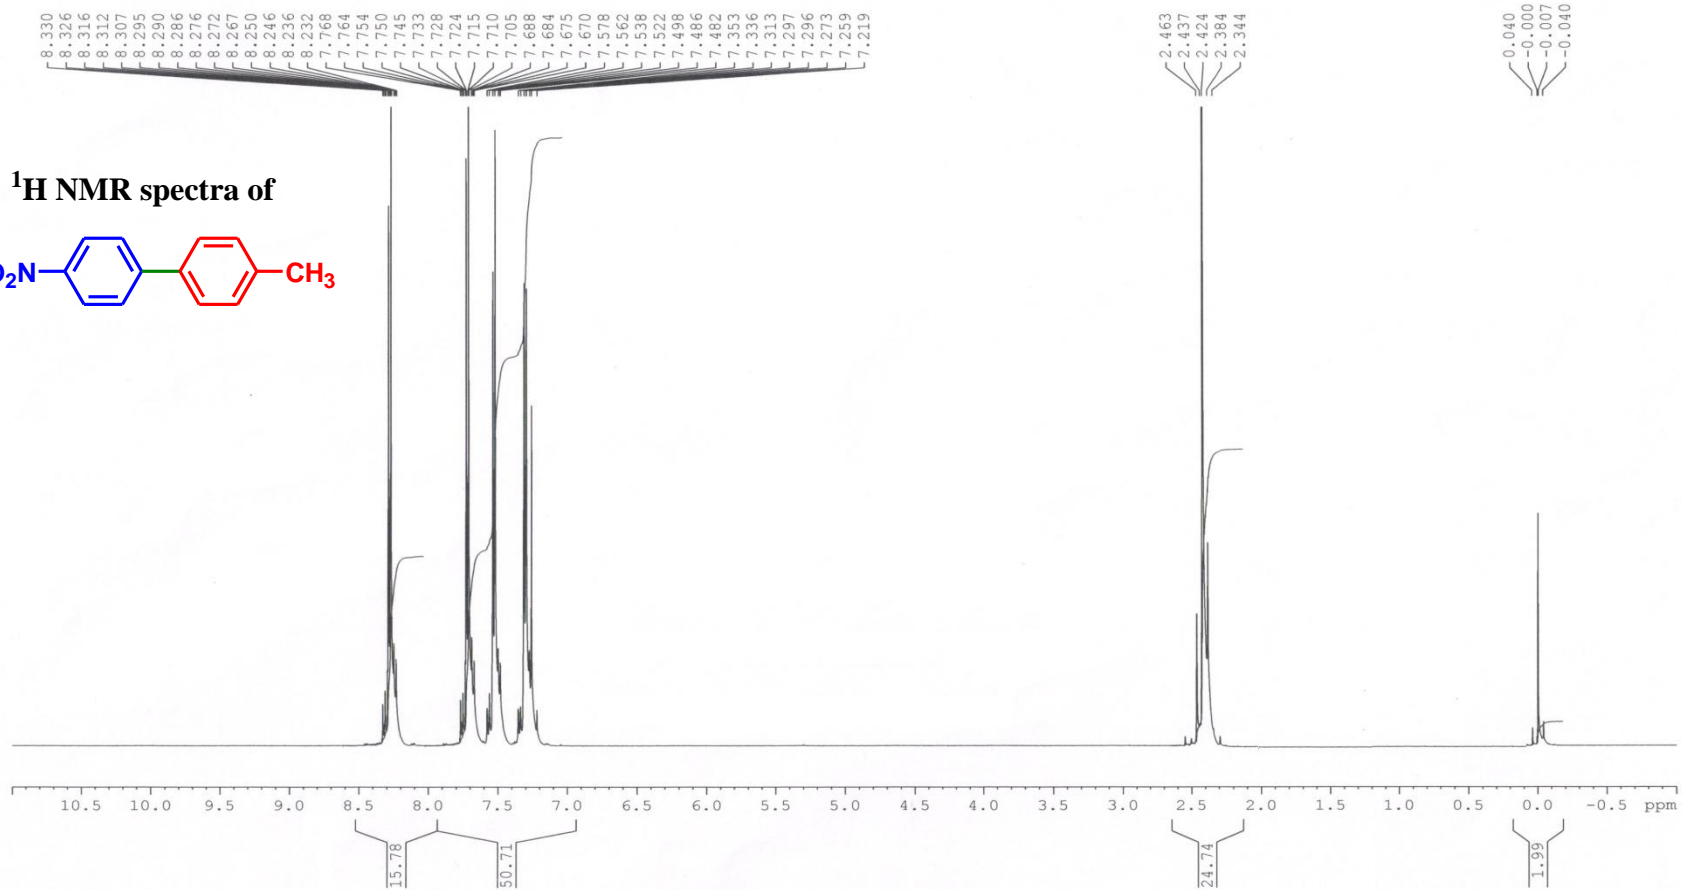

Name of Sample: SB-10  
Spectrum No : 3923

<sup>13</sup>C NMR spectra of

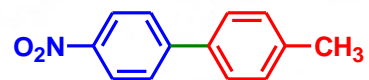

147.47  
146.72

138.99  
135.73

129.78  
127.37  
127.11  
123.99

77.18  
76.93  
76.67

21.11

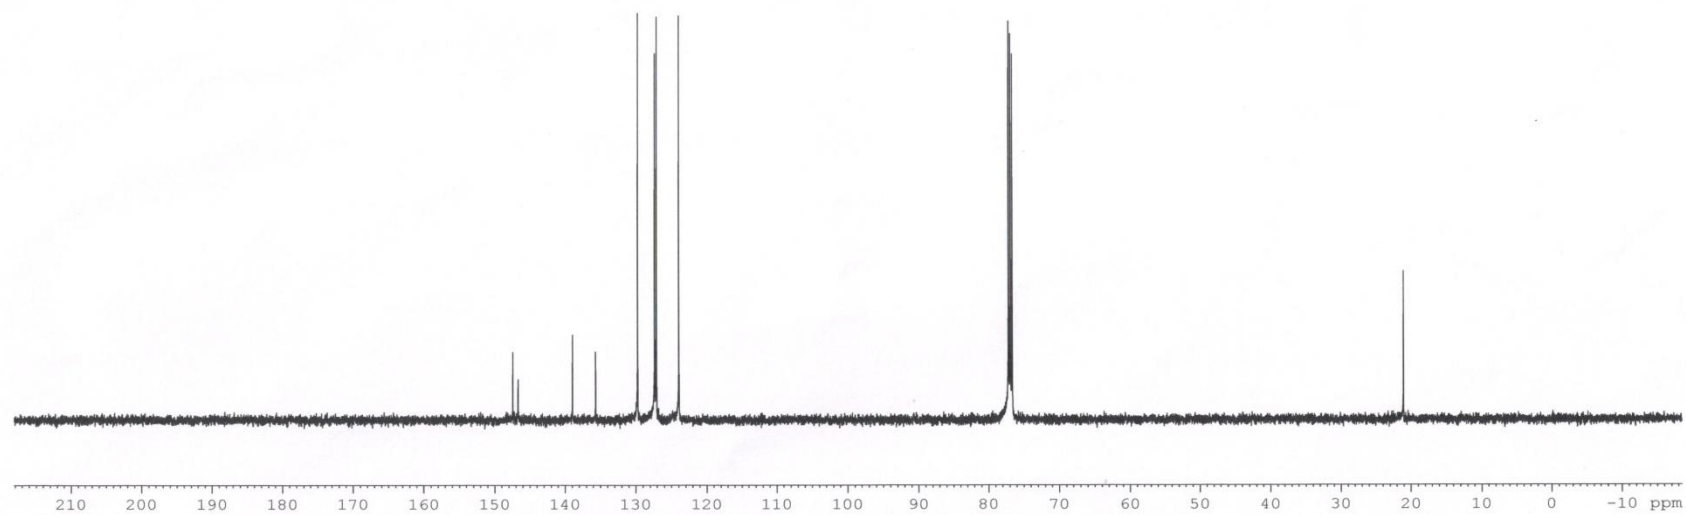

Name of Sample: SB-11  
Spectrum No : 3862

<sup>1</sup>H NMR spectra of

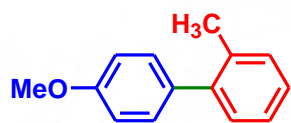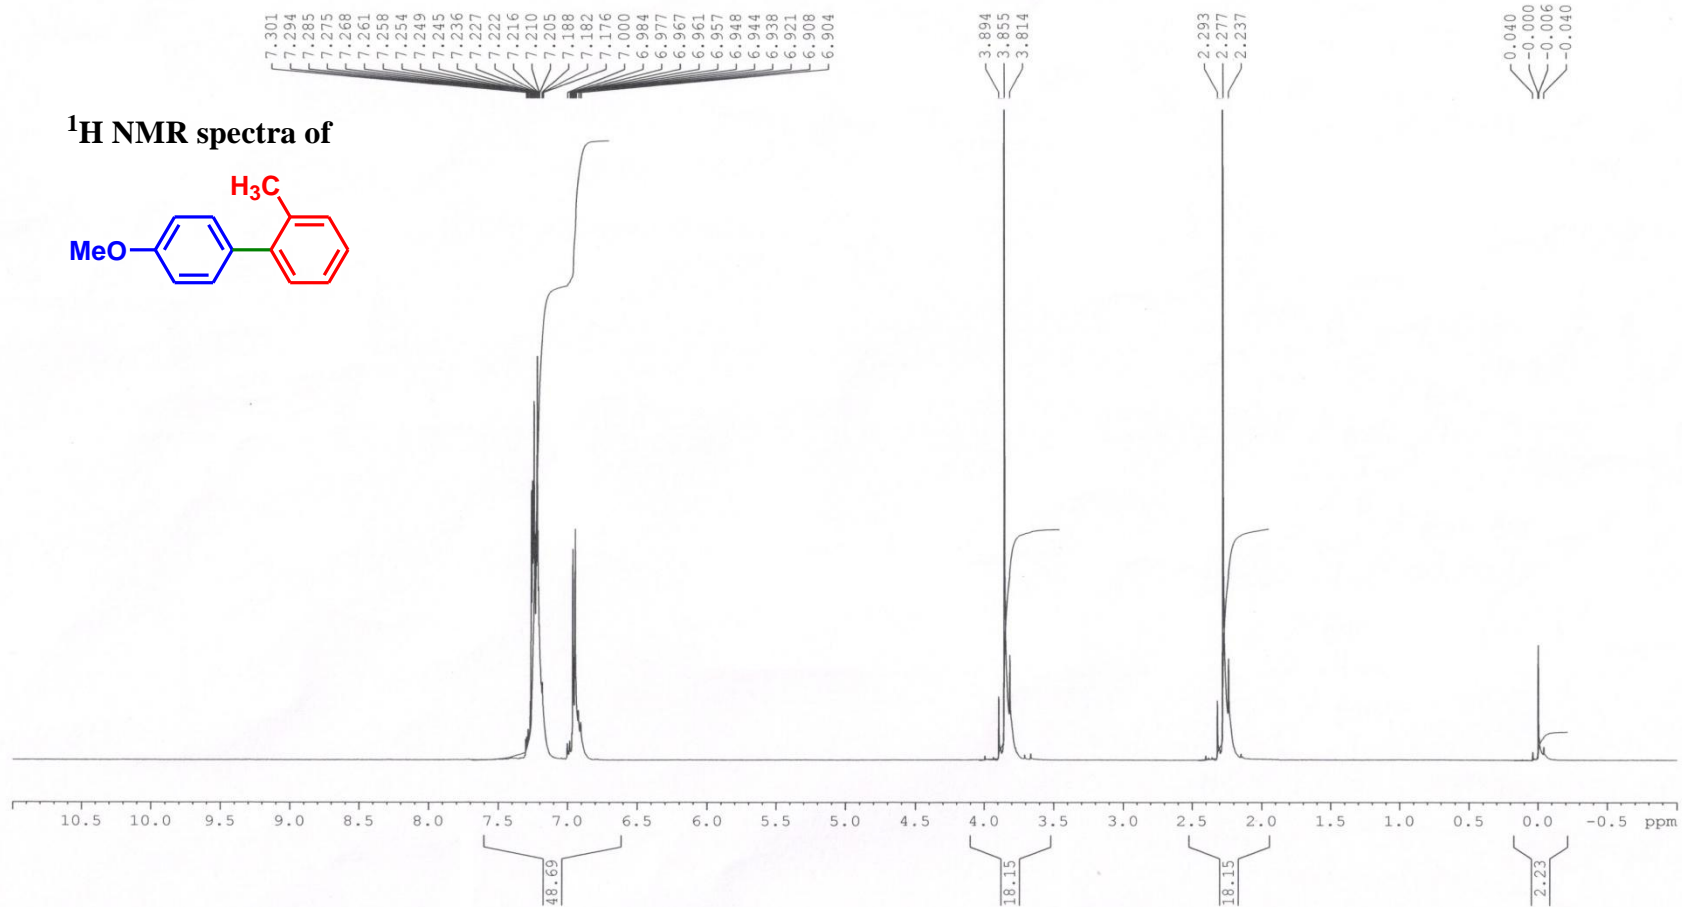

Name of Sample: SB-11  
Spectrum No : 4059

<sup>13</sup>C NMR spectra of

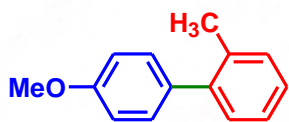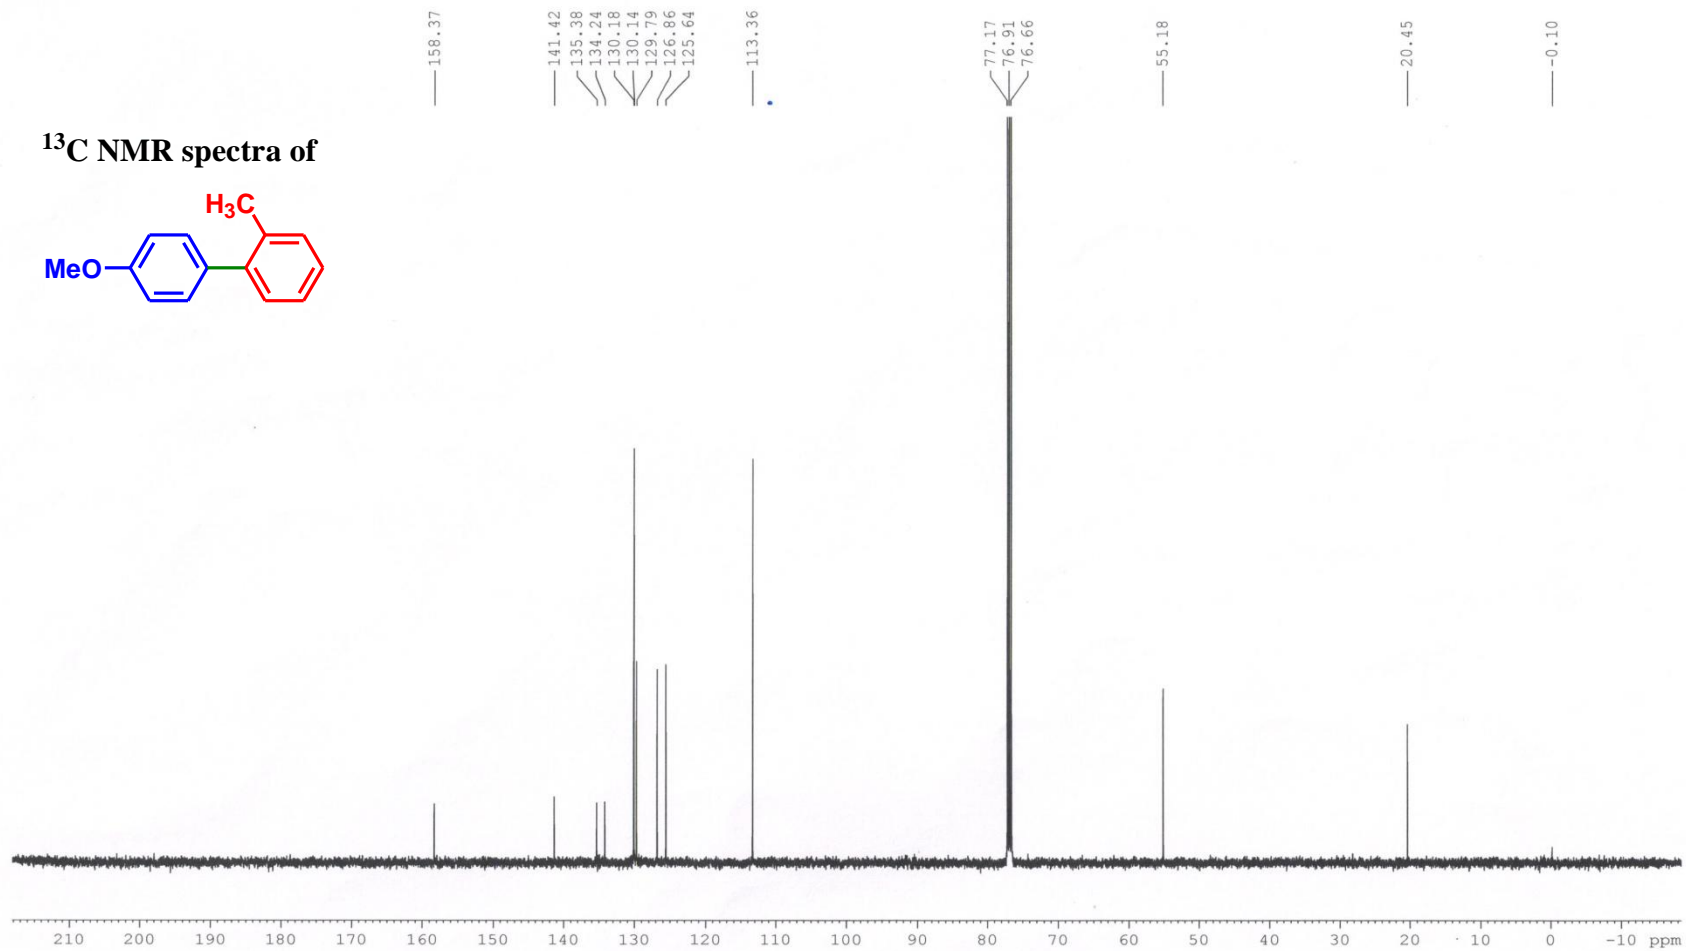

Name of Sample: SB-6  
Spectrum No.: 3746

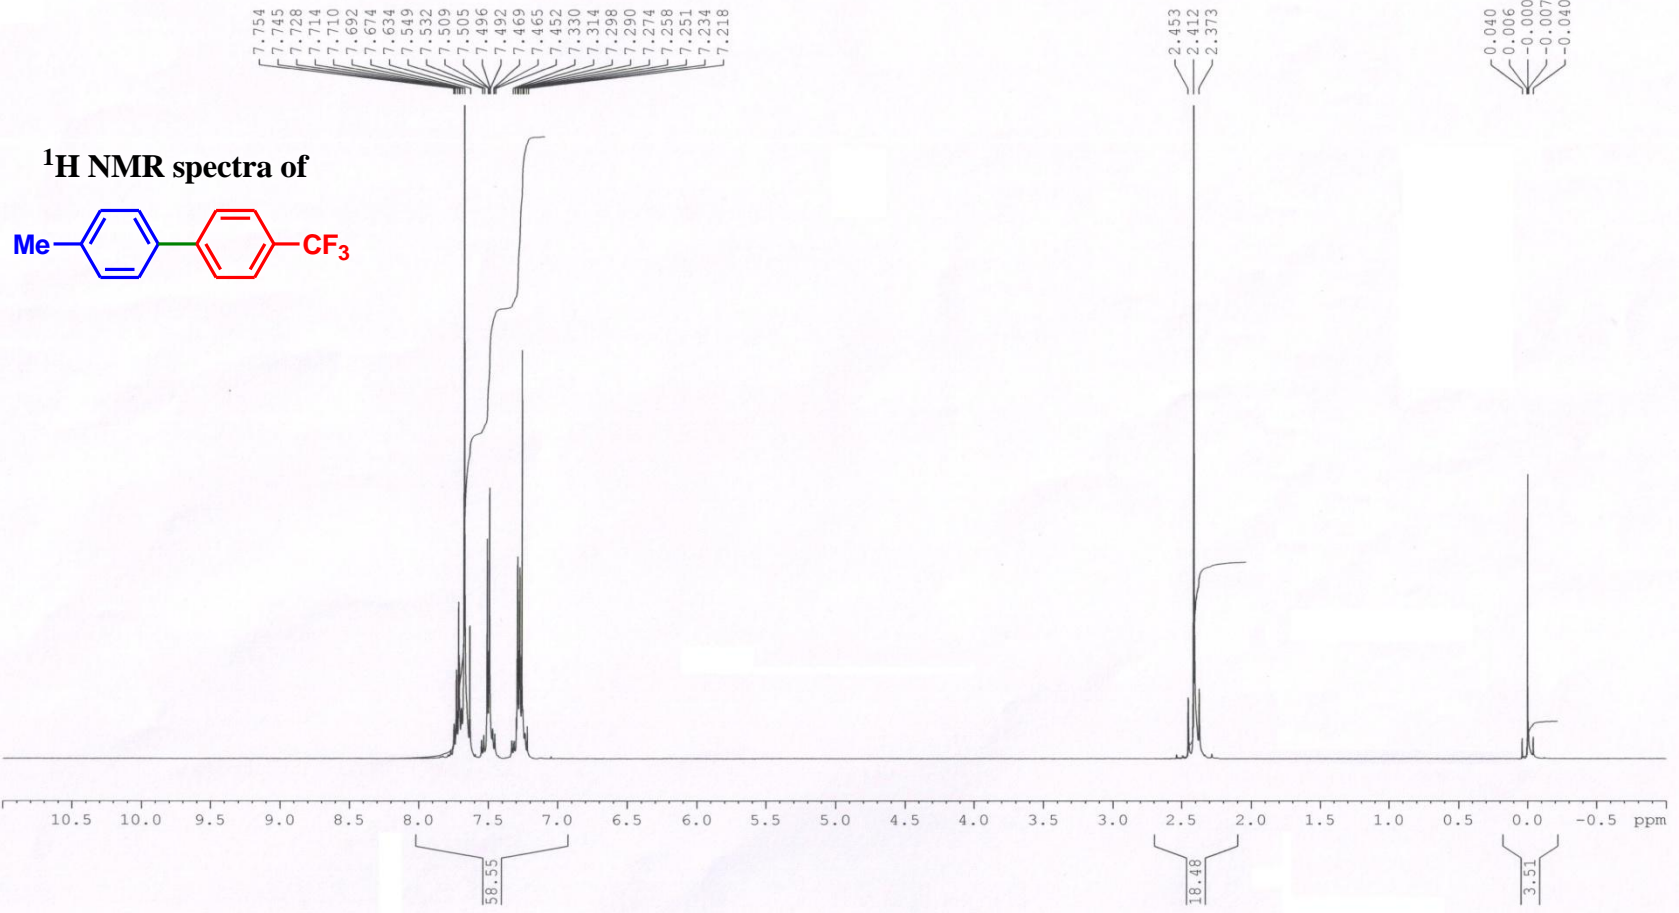

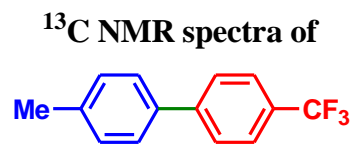

Name of Sample: S-5a  
Spectrum No: 2600

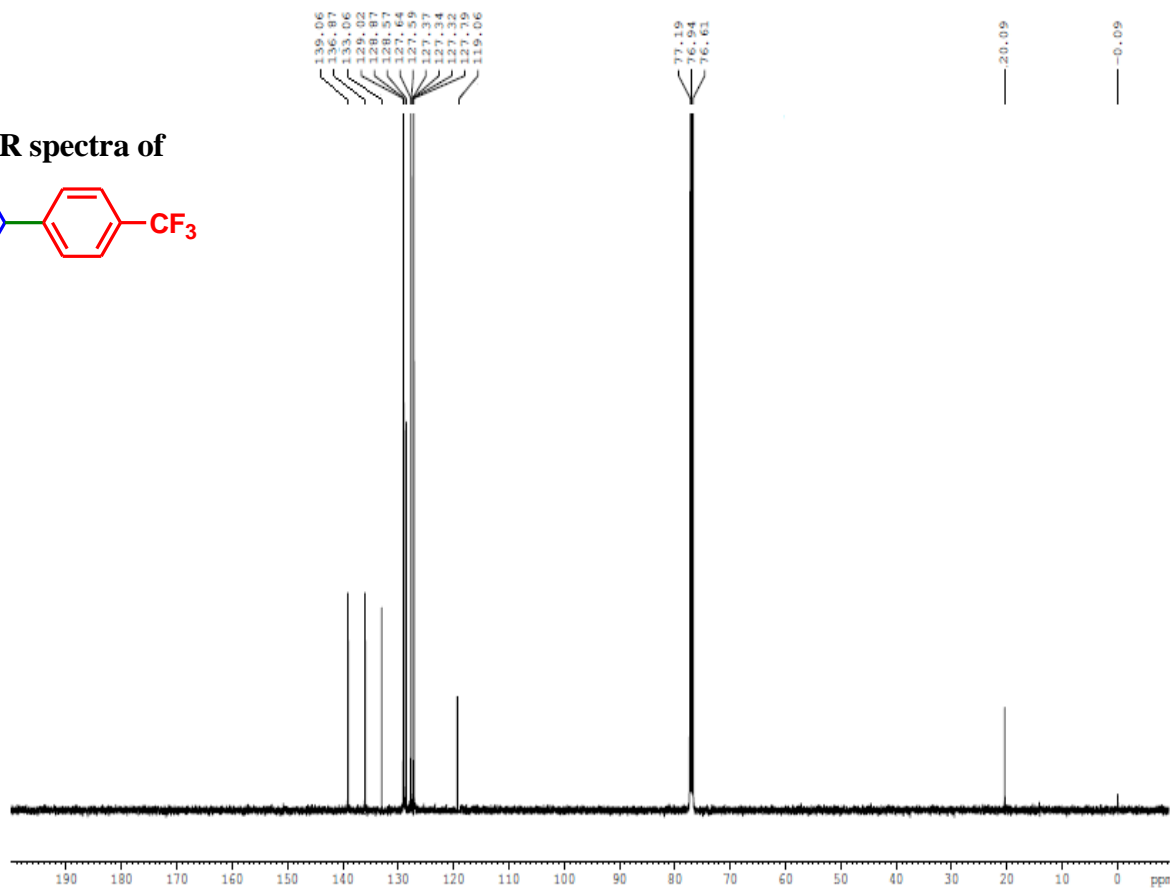

**<sup>1</sup>H NMR spectra of**

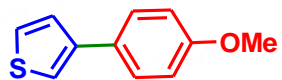

Name of Sample: SB-8  
Spectrum No.: 3758

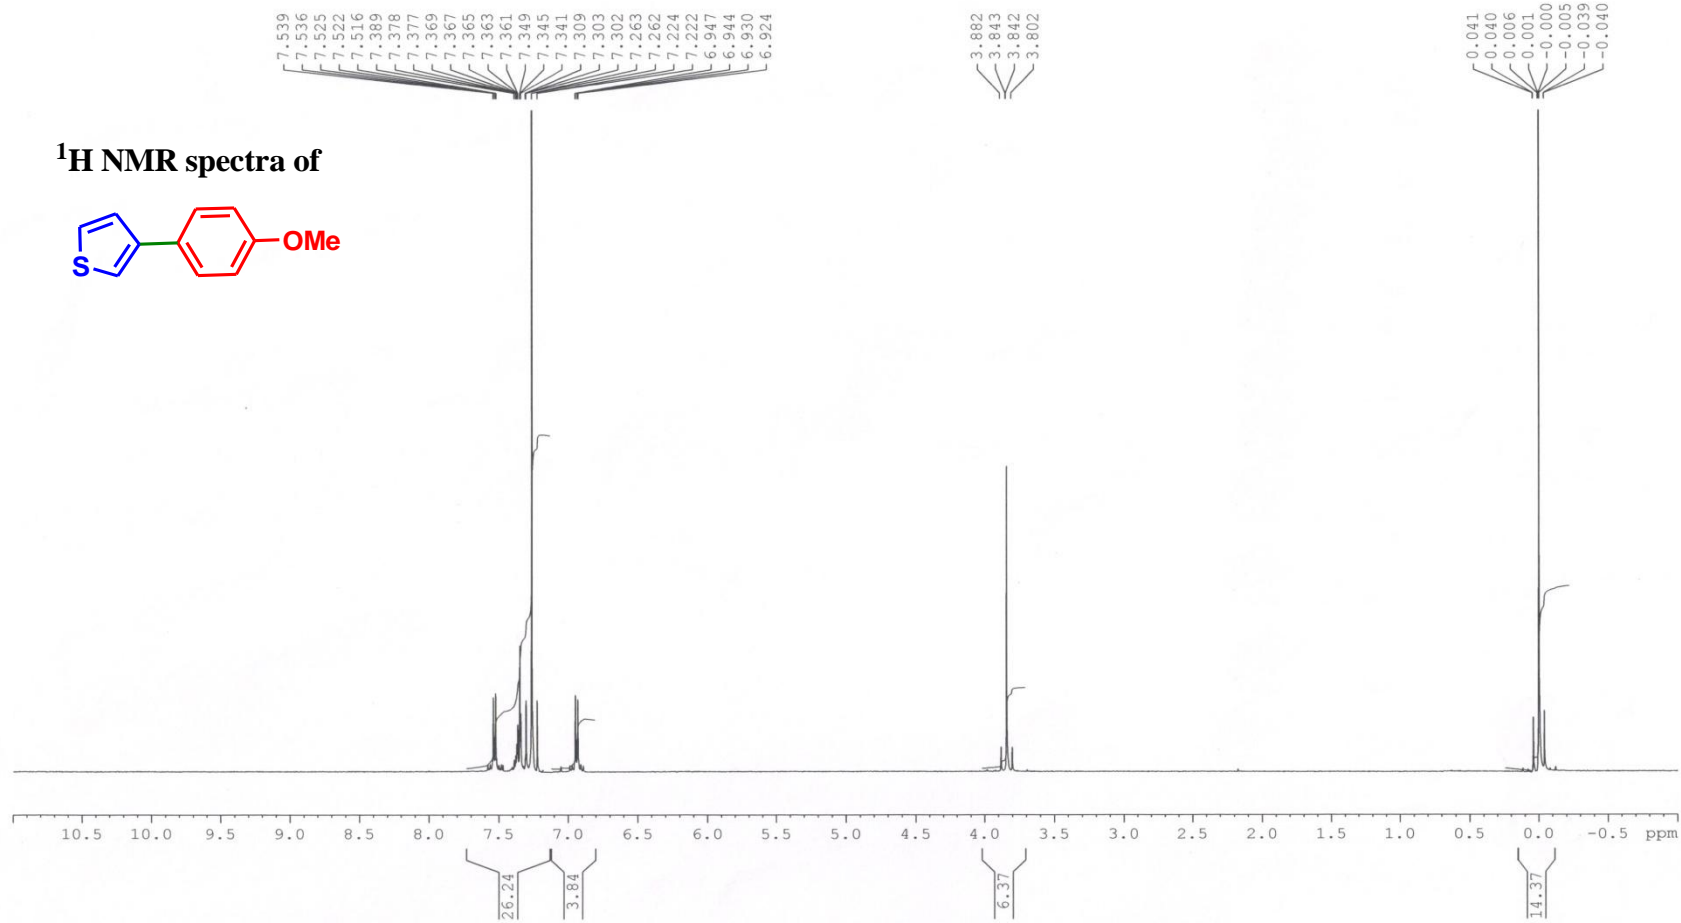

**<sup>13</sup>C NMR spectra of**

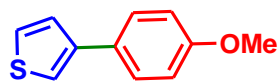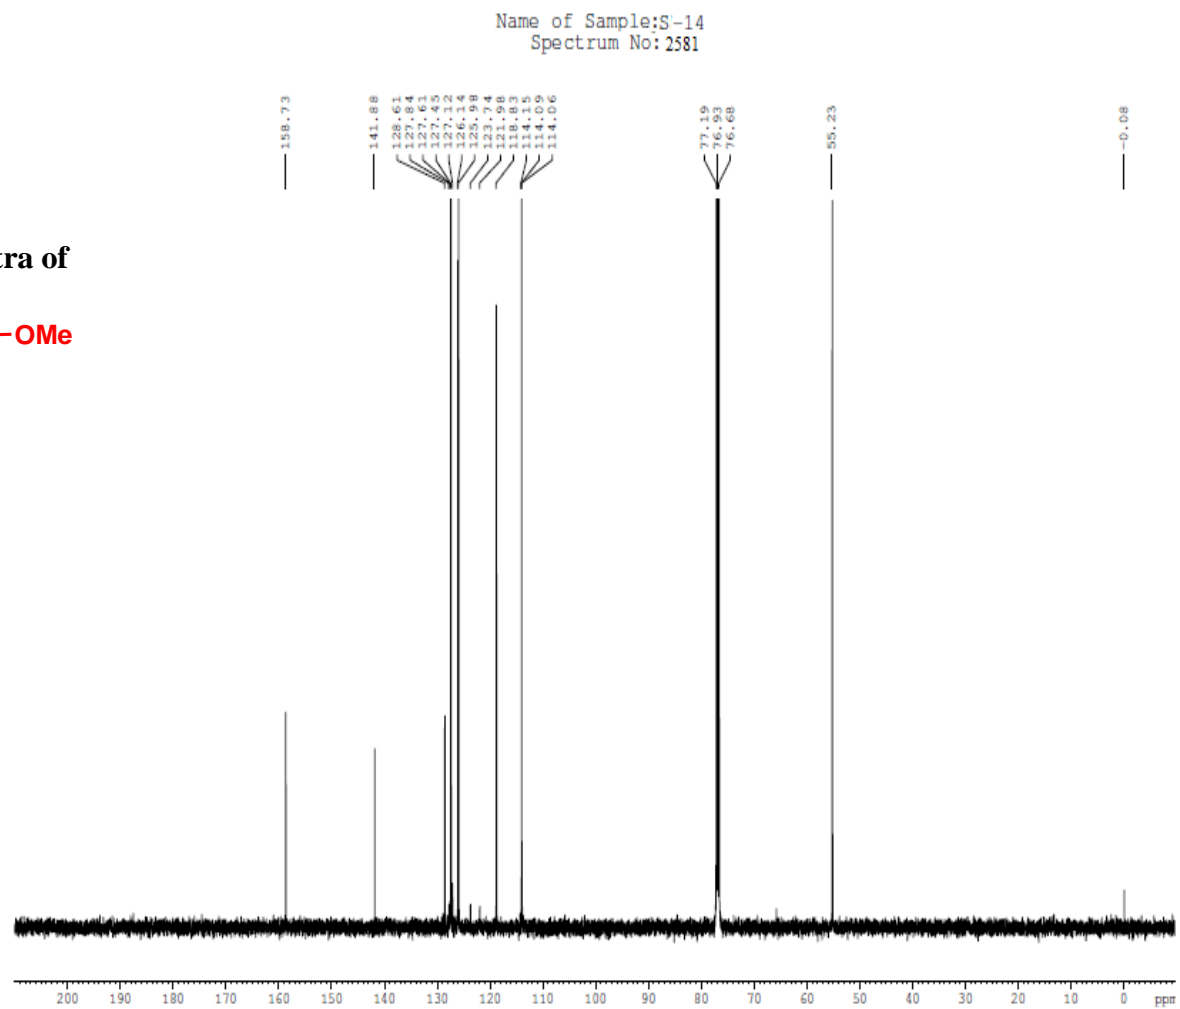



Name of Sample: S-17  
Spectrum No: 2263

<sup>1</sup>H NMR spectra of

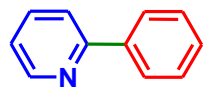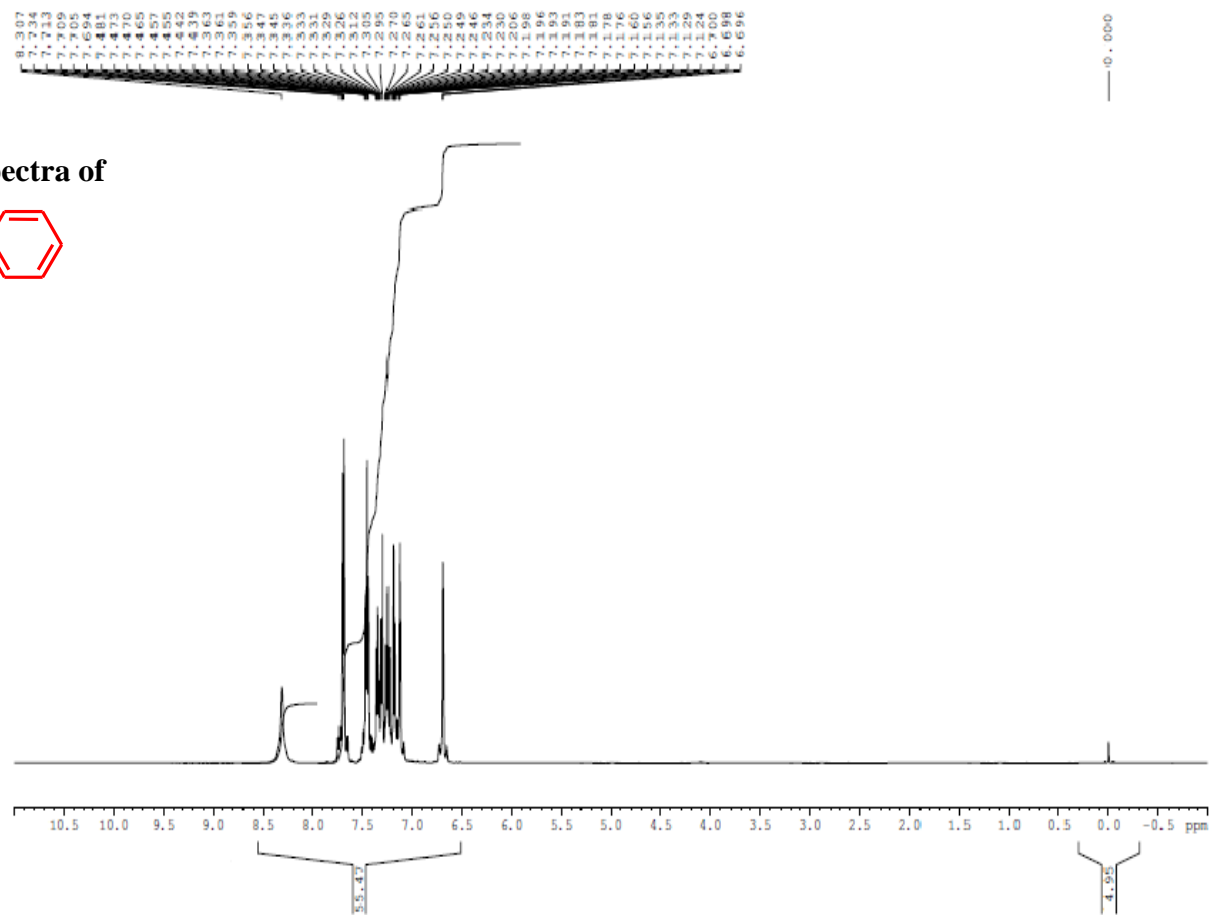

<sup>13</sup>C NMR spectra of

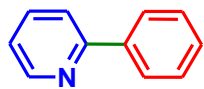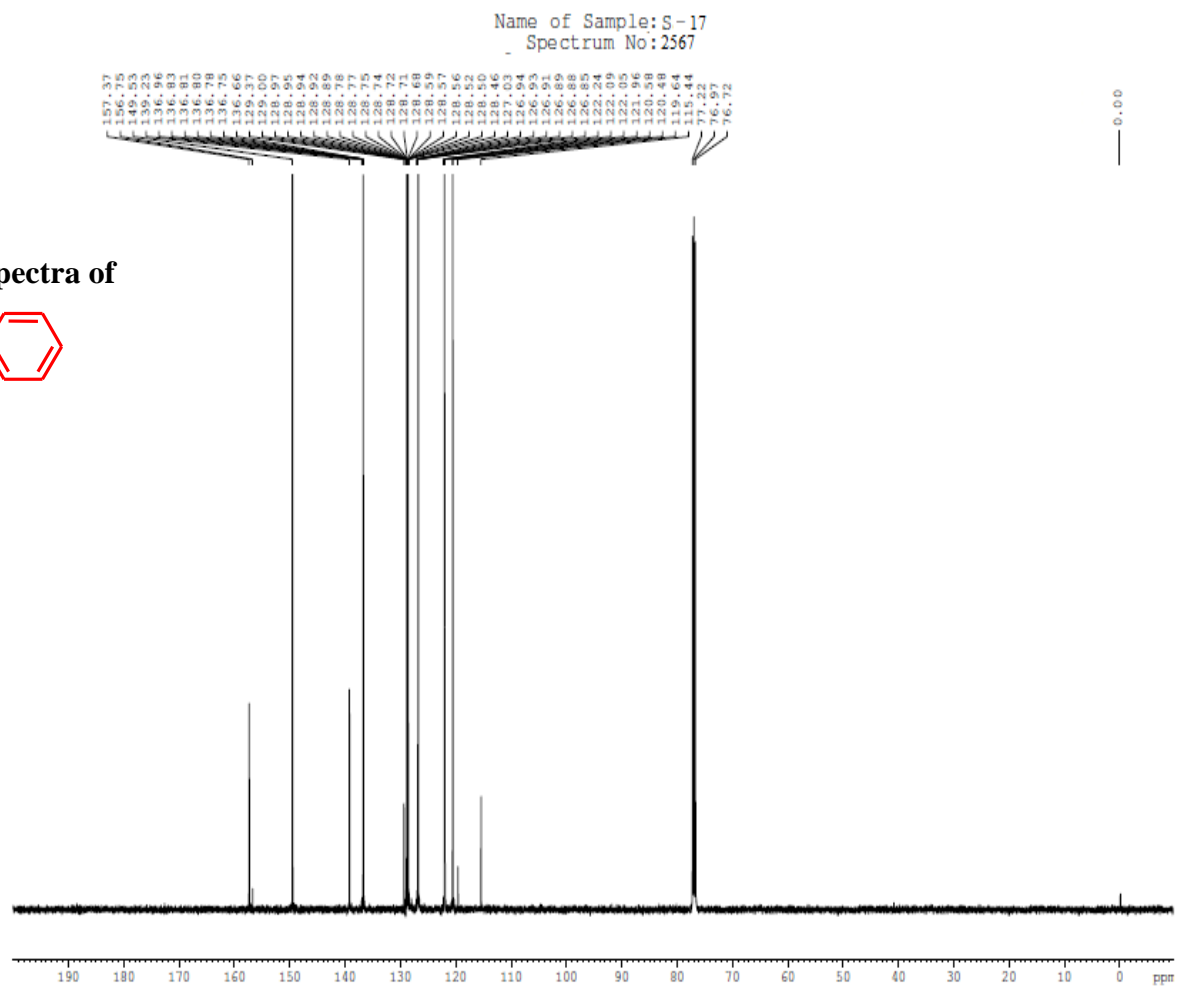

Supplement: c5ra09102k1.pdf [file c5ra09102k1.pdf]
